# Supplementary material
Source: publisher site journal article supplement (https://www.dovepress.com/article/558974)
Supplement: Supplementary file 1 [file 558974%20Supplementary%20Material.docx]

**Case definitions and data collection forms**

# TABLE OF CONTENTS

[TABLE OF CONTENTS 2](#_Toc217846196)

[1. Introduction 5](#_Toc217846197)

[2. Myocarditis and pericarditis 5](#_Toc217846198)

[3. Thrombosis with thrombocytopenia syndrome (TTS) 15](#_Toc217846199)

[4. Guillain-Barré syndrome (GBS) 22](#_Toc217846200)

[5. Anaphylaxis 30](#_Toc217846201)

[6. Idiopathic thrombocytopenia (ITP) 36](#_Toc217846202)

[7. Transverse myelitis 40](#_Toc217846203)

[8. Major congenital anomalies 46](#_Toc217846204)

[9. Narcolepsy 58](#_Toc217846205)

[10. Cerebral venous sinus thrombosis 61](#_Toc217846206)

[11. Deep Vein Thrombosis (DVT) 63](#_Toc217846218)

[12. Pulmonary Embolism (PE) 66](#_Toc217846229)

[13. Hemorrhagic Stroke (acute intracerebral hemorrhage) 70](#_Toc217846241)

[14. Ischemic stroke 72](#_Toc217846242)

[15. Meningoencephalitis including ADEM 75](#_Toc217846243)

[16. Bleeding with Thrombocytopenia (BT) 80](#_Toc217846244)

# Introduction

The VAC4EU Validation Task Force (medically trained persons) developed the procedure for case definitions and ascertainment of level of certainty, which when available were based on Brighton Collaboration (BC) case definitions. The Validation Task Force used available data collection forms from SPEAC and adapted them to real world data. This document presents the final VAC4EU case definitiona and data collection forms adapted from the Birghton Collaboration and SPEAC for the following sixteen adverse events of special interest (AESIs):

- Myocarditis and pericarditis
- Thrombosis with thrombocytopenia syndrome (TTS)
- Guillain-Barré syndrome (GBS)
- Anaphylaxis
- Idiopathic thrombocytopenia (ITP)
- Transverse myelitis
- Major congenital anomalies
- Narcolepsy
- Cerebral venous sinus thrombosis (CVST)
- Deep vein thrombosis (DVT)
- Pulmonaru embolis(PE)
- Hemorrhagic stroke
- Ischemic stroke
- Meningoencephalitis including ADEM
- Bleeding with Thrombocytopenia (BT)

# Myocarditis and pericarditis

The BC case definition for myocarditis and pericarditis used was

Sexson Tejtel SK, Munoz FM, Al-Ammouri I, Savorgnan F, Guggilla RK, Khuri-Bulos N, Phillips L, Engler RJM. Myocarditis and pericarditis: Case definition and guidelines for data collection, analysis, and presentation of immunization safety data. Vaccine. 2022;40(10):1499-1511. doi: 10.1016/j.vaccine.2021.11.074.

The VAC4EU data collection form was based on the SPEAC data collection:

Law, B. AESI Case Definition Companion Guide: Myocarditis and pericarditis. Zenodo; May 2022. DOI [10.5281/zenodo.6668894](https://doi.org/10.5281/zenodo.6668894).

Modifications, indicated in green, were made to make criteria more explicit and to make them suitable for real world data (RWD). The data collection form was subsequently adapted to REDCAP and automated logic was used to attribute a level of diagnostic certainty (LOC).

The following changes are implemented to the original Brighton Collaboration form:

- Two additional levels of certainty were established for Level 2 and Level 3, which expand on the existing framework provided by the Brighton collaboration. Each level was subdivided in two, i.e., Level 2-A, Level 2-B, Level 3-A, and Level 3-B.
- Level 2-A and Level 3-A use the criteria defined by the Brighton collaboration for Level 2 and Level 3, respectively. Level 2-B and Level 3-B maintain all the same criteria, except for the recorded absence of explicit details regarding each criteria.
- Additionally, Level 4 in the VAC4EU classification system was divided into two sublevels: Level 4-A and Level 4-B. Level 4-B aligns with the criteria established by the Brighton Collaboration. A case meet the Level 4-A case defintion only if was reported as myocarditis or pericarditis with insufficient evidence to meet LOC1-3. In addition, a LOC of Level 4-A was attributed if the diagnosis was made by a specialist, and a Level 4-B was attributed when the diagnosis was made by a non-specialist. This sublevel recognizes the expertise and clinical judgment of the specialist in diagnosing myocarditis, taking into account the context of limited evidence.
- To provide further clarity regarding certain criteria, footnotes were included in the data collection form with corresponding references to improve abstractors’ understanding of the criteria and accurately interprete them. These references contain values that can be used to define normal ranges for various markers, such as C-reactive protein (CRP), high-sensitivity CRP (hs-CRP), erythrocyte sedimentation rate (ESR), creatine kinase MB (CK-MB), total Troponin, Troponin I, troponin T, and high-sensitivity troponin.
- Additionally, we expanded the cardiac and inflammatory markers section to also include total troponin, high-sensitivity troponin, and hs-CRP. We believe that if these markers show abnormalities, they hold equal significance and should be reported alongside troponin I, troponin T, and CRP. From a logical standpoint, the level of diagnostic certainty remains consistent regardless of whether troponin T, troponin I, total troponin, or hs-troponin is used. Similarly, the logic of the level of certainty remains unchanged regardless of whether CRP or hs-CRP is used.

By including these markers and their corresponding footnotes, we aimed to provide comprehensive information and ensure that important diagnostic criteria were considered in the assessment process. This approach allowed for a more comprehensive evaluation of cases and enhanced the overall accuracy and reliability of the classification system.

Table . Myocarditis and pericarditis data abstraction form

Record specific information, that is as complete as possible, for all rows in the table below. The red font identifies specific criteria related to the myocarditis and/or pericarditis case definitions.

| 1. Date of illness onset |  | | | |
| --- | --- | --- | --- | --- |
| 2. Hospital admission? |  | | | |
| 3. Admitting diagnosis: |  | | | |
| 4. Discharge diagnosis: |  | | | |
| 5**. Criterion A1**: Cardiac symptoms | 1. Acute chest pain or pressure  2. Palpitations  3. Dyspnea at rest, with exercise or lying down | 4. Diaphoresis  5. Sudden death  6. None of the above | | 7. Unknown if any of 1-5 present or absent |
| **Criterion A-2:** Non- specific symptoms:  adults & older children (12 years or older) | 1. Dizziness or syncope  2. Abdominal pain  3. Fatigue  4. Edema  5. Cough  6. Nausea, vomiting +/or diarrhoea | 7. Shoulder or upper back pain  8. Weakness  9. Cyanosis  10. Altered mental status  11. Low grade intermittent fever (≥38.0oC) | | 12. None of the above  13. Unknown if any of 1-11 present or absent |
| 7**. Criterion A-3**: Non-specific symptoms:  Infants & younger children 11 years or younger | 1. Poor feeding  2. Vomiting  3. Lethargy | 4. Tachypnea  5. Irritability  6. None of the above | | 1. Unknown if any of 1-5 present or absent |
| **Criterion A-4:** combination of A1 and A2 | 1- Confirmed myocarditis symptoms by specialist, but unknown in details | 2-Confirmed pericarditis symptoms by specialist, but unknown in details | |  |
| **Criterion B**: Physical exam features | 1. Pericardial friction rub  2. Pulsus paradoxus | 3. Distant heart sounds (infants & children)  4. None of the above | | 5. Unknown if any of 1-3 present or absent  6. confirmed physical exam confirming pericarditis, without details by specialist* |
| 9. **Criterion C:** Inflammatory Markers  Were there any biomarkers supporting evidence of inflammation? (check all that apply) | 0. None tested, or tested but no results or unknown if tested  1. ESR elevated (highest measured value)  abnormal ESR :   - Men under 50 years old: less than 15 mm/hr - Men over 50 years old: less than 20 mm/hr - Women under 50 years old: less than 20 mm/hr - Women over 50 years old: less than 30 mm/hr - Child ≤10mm/hr - Newborn: 0-2 mm/hr   2. CRP elevated (highest measured value: [[1]](#footnote-1)  abnormal CRP: CRP above 10 mg/L  3. High sensitivity (hs) CRP elevated (highest measured value: hsCRP> 3 mg/L  4. D-dimer elevated (highest measured value:  5. None of the above (choose this option if whichever ones were tested, were within normal range)  6-Confirmed positive inflammatory marker confirming myocarditis whthout details by specialist*. | | | |
| 10. **Criteria D1+D2:** Cardiac biomarkers  Were any myocardial biomarkers measured and if so were they elevated or normal? (check all that apply) | 0. None tested, or tested but no results or unknown if tested  1. D1.1. Troponin T elevated (highest measured value:   - normal Troponin-T in different refrences ≤0.2 ng/mL   2. D1.2 Troponin I elevated (highest measured value:   - Troponin-I: positive levels ranged from 0.5 ng/ml to 50 ng/ml - Total troponin: High: >0.40 ng/ml   3. D2 Creatine Kinase Myocardial Band (CK-MB) elevated (highest measured value:   - normal CK-MB in 2 sources: Normal = 5 to 25 IU/L - CK – MB = 0 to 5 µg/L[[2]](#footnote-2)   4. Normal troponin  5. Normal CK-MB  6- Confirmed elevated cardiac biomarkers confirming myocarditis/pericarditis,without details by specialist* | | | |
| 11. **Criterion E:** Electrocardiogram (ECG) abnormalities  ECG results relevant to myocarditis and/or pericarditis. Read carefully and check all that apply based on available ECG reports done during the illness  AV = atrioventricular | 0. ECG not done, or done but no results available or unknown if done  1. Paroxysmal or sustained atrial or ventricular arrhythmias (premature atrial or ventricular beats, and/or supraventricular or ventricular tachycardia, interventricular conduction delay, abnormal Q waves, low voltages, Sinus tachycardia,SVT, atrial fibrillation, PVCs, VT, VF)  2. AV nodal conduction delays or intraventricular conduction defects (AV block (grade I-III), new bundle branch block)  3. Continuous ambulatory ECG monitoring that detects frequent atrial or ventricular ectopy  4. ST-segment or T-wave abnormalities (elevation or inversion)  5. Newly reduced r-wave height, low voltage, or abnormal q waves  6. Premature atrial and premature ventricular contractions (PACs, PVCs)  7. Diffuse concave-upward ST-segment elevation  8. ST-segment depression in aVR (ECG electrode lead placed on R arm)  9. PR-depression throughout the leads without reciprocal ST-segment changes  10.Nonspecific abnormalities other than those listed above (describe: like Tachycardia)  11. No abnormalities seen on ECG  12-Confirmed ECG abnormality conforming myocarditis without details by specialist*  13-Confirmed ECG abnormality conforming pericarditis without details by specialist* | | | |
| 12. **Criterion F:** Echocardiogram abnormalities  Echocardiogram results relevant to myocarditis and/or pericarditis. Read carefully and check all that apply based on available echocardiogram reports. | 0. Echocardiogram not done, or done but no results or unknown if done  1. New focal or diffuse left or right ventricular function abnormalities (e.g. decreased ejection fraction)  2. Segmental wall motion abnormalities  3. Global systolic or diastolic function depression/abnormality (Decreased longitudinal and circumferential strain and strain rates on tissue Doppler)  4. Ventricular dilation  5. Wall thickness change  6. Evidence of abnormal fluid collection or pericardial inflammation  7. No abnormalities seen on echocardiogram  8. Confirmed echocardiogram confirming myocarditis without details by specialist*  9. Confirmed echocardiogram confirming pericarditis without details by specialist* | | | |
| 13. **Criterion G:** Cardiac magnetic resonance (cMR) abnormalities  CMR results relevant to myocarditis and/or pericarditis. Read carefully and check all that apply based on available cMR reports. | 1. 1. cMR not done, or done but no results or unknown if done 2. Edema on T2 weighted study, typically patchy in nature 3. 2. Late gadolinium enhancement on T1 weighted study with an increased enhancement ratio between myocardial and skeletal muscle, typically involving at least one non-ischemic regional distribution with recovery (myocyte injury) 4. 3. Evidence of abnormal fluid collection or pericardial inflammation 5. 4.No abnormalities seen 6. 5. Other abnormality. Describe: 7. Confirmed cMR confirming myocarditis without details by specialist* 8. Confirmed cMR confirming pericarditis without details by specialist* | | | |
| 14**. Criterion H**: Chest MRI and/or CT abnormalities  NOTE: one or the other of chest MRI and CT may have been done. | 1. Chest MRI and CT not done, or unknown if done, or no results available  2. Chest MRI or CT showed evidence of abnormal pericardial fluid collection or pericardial inflammation  3. Chest MRI and CT normal (choose this if only 1 test done but normal) | | 4. Chest MRI and/or CT had abnormalities  other than above. Describe:  5.Confirmed chest MRI and/or CT confirming pericarditis without details by specialist* | |
| 15**. Criterion I:** Chest X-ray (CXR) abnormalities | 0. CXR not done, or unknown if done, or no results available  1. CXR abnormal showing enlarged heart  2. CXR normal  3. CXR had abnormalities other than enlarged heart. Describe  4.Confirmed CXR confirming pericarditis without details by specialist | | | |
| **16. Criterion J:** Cardiac tissue examination  Histopathologic exam of cardiac tissues (autopsy or endomyocardial biopsy (check all that apply) | 0. Not done, unknown if done or no results  1. Myocardial inflammation*  2. Pericardial inflammation*  3. No inflammation seen  Describe the abnormalities seen:  4-confirmed tissue biopsy confIrming Myocarditis/Pericarditis withouth details by specialist* | | | |
| **Criterion X:** Alternate diagnosis for cardiac findings.  Alternate diagnosis/diagnoses for the cardiac findings exclude myocarditis or pericarditis as a diagnosis. The case definition doesn’t require that investigation(s) be done for these entities, but any that are documented should be noted here. If there is a history of prior events it would also be good to capture but would need discussion with a physician to determine if it is an exclusión to myocarditis and/or pericarditis.  (Check all that apply) | 1. No alternate diagnosis identified  2. Systemic inflammatory disease. Specify:  3. Cardiac tumour (rhabdomyosarcoma)  4. Metastatic cancer. Specify:  5. Metabolic disorder (e.g. hypothyroidism, renal failure, uremia) Specify:  6. Cardiotoxic drug / other toxins. Specify:  7. Chest cavity radiation  8.Myocardial infarction  9.Pulmonary embolism  10. Mediastinitis  11. Other: Describe below like mediastinis | | | |

SPEAC INTERPRETATION FORM FOR MYOCARDITIS and PERICARDITIS CRITERION VALUES: **** These criteria are relevant only to the pericarditis case definition***

| CRITERIA | | | CRITERION OPTIONS | | | Criterion Value |
| --- | --- | --- | --- | --- | --- | --- |
| Criterion = YES (Y) IF: | Criterion = NO (N) IF: | Criterion = UNKNOWN (U) IF: |
| A-1: Cardiac Symptoms | | | ≥1 of A-1: (1,2,3,4 or 5) **OR A4-1** | A-1 = 6 | A-1 - 7 | A-1 = Y N U |
| A-2: Non-specific symptoms:  Relevant to Adult/older child | | | ≥2 of A-2: (1,2,3,4 or 5) **OR A4-1** | < 2 of A-2(1,2,3,4 or 5) OR A2 = 12 | A-2 = 13 | A-2 = Y N U |
| A-3: Non-specific symptoms:  Relevant to Infant/young child | | | ≥2 of A-3: (1,2,3,4 or 5) **OR A4-1** | < 2 of A-3(1,2,3,4 or 5) OR  A3 = 6 | A-3 = 7 | A-3 = Y N U |
| A-4: Combination of A-1 & A-2 | | | ≥1 of A-1(1-3) & ≥2 of A-2(3- 11) **OR A4-2** | A-1 = None of (1,2 or 3) OR A-2 = <2 of (3-11) OR A-2 = 12 | A-1 = 7 or A-2 = 13 | A-4 = Y N U |
| B: Physical exam features | | B-1* | For B-1: ≥1 of B (1, 2 or 3) | B = 4 | B = 5 | B-1 = Y N U |
| B-2* | For B-2: ≥1 of B: (1 +/or 2) | B = 4 | B = 5 | B-2 = Y N U |
| C-Inflammatory markers | | | C = 1,2,3 or 4 OR C-6 | C = 5 | C = 0 | C = Y N U |
| D-Cardiac biomarkers | | D-1 | D = 1 +/or 2 | D = 4 | D = 0 | D-1 = Y N U |
| D-2 | D = 3 OR D2-6 | D = 5 | D = 0 | D-2 = Y N U |
| **E-ECG** (Electrocardiogram) | | E-1 | E = 1 +/or 2 +/or 3 | E = 11 | E = 0 | E-1 = Y N U |
| E-2 | E = 4 +/or 5 +/or 6 **OR E-7** | E = 11 | E = 0 | E-2 = Y N U |
| E-3* | E = all 3 of (7 + 8 + 9) | E = 11 | E = 0 | E-3 = Y N U |
| E-4* | E = 1-2 of (7 or 8 or 9) | E = 11 | E = 0 | E-4 = Y N U |
| E-5* | E = 10 | E = 11 | E = 0 | E-5 = Y N U |
| F-Echocardiogram | | F-1 | F = ≥1 of:(1,2 3,4or5) OR F1-8 | F = 7 | F = 0 | F-1 = Y N U |
| F-2* | F = 6 OR F1-9 | F = 7 | F = 0 | F-2 = Y N U |
| **G-cMR** (Cardiac Magnetic Resonance imaging) | | G-1 | G = 1 +/or 2 OR G-6 | G = 4 | G = 0 | G-1 = Y N U |
| G-2* | G = 3 OR G-7 | G = 4 | G = 0 | G-2 = Y N U |
| H-Chest MRI/CT | | H* | H = 1 OR H-4 | H = 2 | H = 0 | H = Y N U |
| I-Chest-X-Ray | | I* | I = 1 OR I-4 | I = 2 | I = 0 | I = Y N U |
| **J-Endomyocardial Biopsy** ( heart tissues microscopy) | | J-1 | J = 1 | J = 3 | J = 0 | J-1 = Y N U |
| J-2* | J = 2 | J = 3 | J = 0 | J-2 = Y N U |
| X-Alternative diagnosis | X | | Any of X (1-11) checked | No alternative diagnosis | Not Applicable | X = Y N |

| **Level of Certainty** | **MYOCARDITIS** |
| --- | --- |
| Level 1 : 2 possibilities  (1.1 OR 1.2) | 1.1 J-1 = YES |
| 1.2 [D-1 = YES) AND (F-1 OR G-1 = YES)] |
| Level 2A | [ A-1 OR A-2 OR A-3 = YES ] AND [(D1 +/or D2 = YES) OR (E-1 = YES) OR (F-1 = YES) OR (G-1 = YES)] AND [ X = NO ] |
| Level 2B | A4-1=YES **AND** [ D2-6=YES OR E-12=YES OR F-8=YES OR G-6=YES] **AND** [ X = NO ] |
| Level 3A | [ A-1 OR A-2 OR A-3 = YES ] AND [ (C = YES) OR (E-2 = YES) ] AND [ X = NO ] |
| Level 3B | A4-1=YES **AND [**C-6=YES **] AND [** X = NO **]** |
| Level 4A | Reported as a case of myocarditis by specialist but fails to meet any level of certainty **AND [** X = NO **]** |
| Level 4B | Reported as a case of myocarditis but fails to meet any level of certainty |
| Level 5 | X = YES (NOTE : this exclusion applies only to levels 2 and 3 ) |

| **Level of Certainty** | **PERICARDITIS** |
| --- | --- |
| Level 1 : 2 possibilities  (1.1 OR 1.2) | 1.1 J-2 = YES |
| 1.2 ≥2 of : [(B-1 = YES) OR (E-3 = YES) OR (F-2 or G-2 or H = YES) ] |
| Level 2A | [ A-1 or A-3 = YES ] AND [(B2 = YES) OR (E-4 = YES) OR (F-2 or G-2 or H = YES) ] AND [ X = NO] |
| Level 2B | A4-2=YES AND [ D2-6=YES OR E-13=YES OR F-9=YES OR G-7=YES] AND [ X = NO ] |
| Level 3A | [ A-3 or A-4 = YES ] AND [ (E-5 = YES) or (I = YES) ] AND [ X = NO ] |
| Level 3B | A4-2*=YES **AND [**I-4=YES**]** **AND** [ X = NO] |
| Level 4A | Reported as a case of pericarditis by specialist but fails to meet any level of certainty AND [ X = NO ] |
| Level 4B | Reported as a case of pericarditis but fails to meet any level of certainty |
| Level 5 | X = YES (NOTE : this exclusion applies only to levels 2 and 3 ) |

# Thrombosis with thrombocytopenia syndrome (TTS)

The BC case definition for TTS used was :

Chen R, Buttery J. DRAFT - TTS: Case definition & guidelines for data collection, analysis, and presentation of immunization safety data. Zenodo; Nov 2021. DOI [10.5281/zenodo.6697332](https://doi.org/10.5281/zenodo.6697332).

The VAC4EU data collection form below was based on this, but included modifications (in green), to make criteria more explicit and to be more suitable for the reality of RWD. This form was built subsequently in REDCAP and automated logic was applied to calculate the LOCs.

The following changes are implemented to the original Brighton Collaboration form:

- Inclusion of additional symptoms for clinical syndromes to guide case abstraction.
- Acceptance of specialist-confirmed diagnoses without detailed supporting evidence for each syndrome to accommodate missing or incomplete documentation in RWD.
- Detailed D-dimer cutoffs, including age-adjusted thresholds and definitions for “≥8× ULN” to support standardised interpretation.
- Structured section to document differential diagnoses that could exclude TTS.
- Inclusion of Levels 4a and 4b to distinguish between cases reported by a specialist without sufficient evidence and those lacking both evidence and specialist confirmation.
- Retention of Level 5 for cases meeting exclusion criteria or not fulfilling LOC 1–3 requirements.
- Addition of checkboxes and explicit “Yes/No/Unknown” fields to enable automated LOC assignment.
- Integration of footnotes with laboratory reference ranges to guide consistent abstraction.

Table . TTS data abstraction form

| 1. Date of event onset |  |
| --- | --- |
| 2.Date of Thrombocytopenia |  |
| 3. Hospital admission? (no/yes, date) |  |
| 4. Admission diagnosis: |  |
| 5. Discharge diagnosis: |  |

The case definition (CD) level of certainty (LOC) were determined based on a series of clinical conditions defined below.

**Condition A**: ☐ Platelet count <150 X 10^9/L and of new onset with no known recent exposure to heparin (within the last 30 days),

Platelet count value and unit**___________**

- Yes
- No
- Unknown

**Condition B1**: ☐ Presence of thrombosis/thromboembolism confirmed by ≥ 1 of the following (Check all that apply below)

Imaging Study

- Ultrasound – Doppler
- CT scan – contrast / angiography
- Magnetic resonance venography or arteriography
- Echocardiogram
- Perfusion V/Q scan
- Conventional angiography / digital subtraction angiography
- No imaging studies done, unknown if done, or done but results unknown
- The imaging done, but no sign of thrombosis is presents

☐ Surgical procedure - that confirmed presence of a thrombus (e.g. thrombectomy)

Please describe: _______

☐ Pathologic examination – including biopsy or autopsy

Please describe:_______

**Condition B2**: ☐ Severe and persistent headache around 10 days before or after onset of event with elevated D-dimer ≥4000 mcg/L (FEU) OR Elevated D-dimer ≥8x ULN for age a

The highest value:______

**Condition C**: ☐ Clinical presentation suggests one of the specific clinical syndromes below? (Check the most appropriate) NOTE: The signs/symptoms for each criterion are suggestive of the syndrome if any of them is present you can check the item. Diagnosis of the syndrome by a clinical specialist is also acceptable

Cerebral venous sinus thrombosis / other cerebral venous thrombosis

- New onset of unexplained headache, often severe, typically persisting;
- Focal cerebral dysfunction
- Encephalopathy
- Seizure
- Blurred vision
- Double vision
- Loss of, or change in, level of consciousness;
- Ocular chemosis
- Confirmation by specialist without details
- Unknown

Deep vein thrombosis

- New onset swelling usually but not always in lower extremities;
- localised swelling accompanied by pain [may be crampy in nature] and tenderness
- Reddened/discoloured/warm skin
- Pitting edema;
- Absent pulses in legs or arms
- Calf pain or tenderness
- Confirmation by specialist without details
- Unknown

Pulmonary thromboembolism

- Sudden onset: shortness of breath [at rest or on exertion]
- Pleuritic chest pain [sudden, intense, sharp, stabbing or burning in nature, made worse by breathing/coughing/sneezing/laughing]
- Cough +/- hemoptysis
- Tachypnea
- Tachycardia
- Arrhythmia
- Cyanosis
- Hypotension
- Confirmation by specialist without details
- Unknown

Intra-abdominal thrombosis.

- Abdominal pain [may be out of proportion to physical exam findings],
- Bloating
- nausea
- Vomiting
- Diarrhea
- Bloody stools
- Ascites
- Hepatomegaly if hepatic vein location
- Confirmation by specialist without details
- Unknown

Ischemic stroke

- Sudden onset of focal neurologic deficits such as difficulty with speech [dysphasia or dysarthria]
- Hemiparesis
- Ataxic gait
- Abnormal eye movements
- Facial paresis
- Confirmation by specialist without details
- Unknown

Myocardial infarction

- Chest pain [often crushing in nature]
- Shortness of breath
- Arrhythmias
- Cyanosis
- Sudden death
- Confirmation by specialist without details
- Unknown

Arterial Thrombosis

- Pale colour of the arm or leg
- Cold arm or leg
- Decreased or no pulse in an arm or leg
- Lack of movement in the arm or leg
- Weakness of an arm or leg
- Confirmation by specialist without details
- Unknown

**Condition D:** ☐ One or more of these imaging or lab findings supportive of the diagnosis of thrombosis / thromboembolism? (Check all that apply)

☐ Echocardiogram or doppler ultrasound

☐ Computed tomography without contrast or MRI

☐ 2000 >D-dimer ≥500 mcg/L (FEU) OR D-dimer (Elevated above upper limit of normal for age a)

The highest value:______

**Condition E**: ☐ At least one of these Lab findings that are strongly supportive of the diagnosis of platelet-activating antibody mediated thrombosis? (Check all that apply)

☐ 4000 >D-dimer ≥2000 mcg/L (FEU) OR D-dimer (Elevated above 4 times upper limit of normal for age a)

The highest value:______

☐ Positive anti-platelet factor 4 (PF4) assay: specific anti-PF4 ELISA (note: rapid tests are insensitive for these antibodies) or functional test with addition of PF4

☐ Yes

☐ No

☐ Unknown

**Condition F:** Reported as a case of TTS by specialist, without details

- Yes
- No

**Condition X**: Alternative diagnosis

- Yes, An alternative diagnosis was found that explained the acute illness, describe:
- No, No alternative diagnosis was found to explain the acute illness

**Level of Certainty for TTS**

If yes to (A and B1) is level 1

yes to (A and B2) and X = NO: then is Level 1

If no to (B1 and B2)_and_[If yes to A plus yes to (C and E)] and X=NO then is level 1

If no to (B1 and B2)_and_NO to X and [If yes to A plus yes to (C and D)] then is level 2

If no to (B1 and B2)_ and_NO to X and_[If yes to A plus [(yes to C) and (no to D and E)] then is level 3

If there is insufficient information to determine the conditions needed to a level of certainty of 1, 2 or 3 and F = Yes then the level of certainty is level 4a

If there is insufficient information to determine the conditions needed to a level of certainty of 1, 2 or 3 and F = No then the level of certainty is level 4b

If there is sufficient information to determine the conditions A, B, C, D, and E but the aggregate of the conditions do not meet the LOC 1, 2, or 3 then the LOC is Level 5; Not a Case of TTS and/or X = Yes

**aAge-adjusted D-dimer**

D-dimer levels rise with age such that using the traditional cutoff value of < 500 ng/mL (fibrogen equivalent units) results in reduced specificity of D-dimer testing in older patients (>50 years), a population in whom PE is common. Several studies report its use with the most commonly used formula for age adjustment as:

Age (if over 50 years) x 10 = cutoff value in ng/mL or ug/L (fibrinogen equivalent units)

If reported by the lab as a D-dimer unit (DDU) the cutoff is often **230 ng/mL**.
2 FEUs equal 1 DDU.

- If using a lab with a cutoff of 230 (DDU assay) then formula is Age x 5

1. **Example 1-A: *45-year-old*** patient was admitted to the hospital with ***D-dimer 300 ng/mL***: since the patient is <50 years old the traditional standard cutoff value of 500 ng/mL should be applied. We can see that the ***D-dimer value is below the threshold***. (300 ng/mL < 500 ng/mL)
2. **Example 2-A: *65-year-old*** man was admitted to hospital with ***D-dimer 600 ng/mL***.as the patient is >50 years old the age-adjusted formula is applied and the age (65) is multipled by 10, resulting in a cutoff value of 650 ng/mL. ***The patient's D-dimer level (600 ng/mL), is below the threshold*** (for this patient, 8x ULN would be 650 x 8).

# Guillain-Barré syndrome (GBS)

The BC case definition for GBS used was :

Law B, Dekker CL, Sturkenboom, M. AESI Case Definition Companion Guide: Guillain Barré and Miller Fisher Syndrome; Feb 2021. DOI [10.5281/zenodo.6668878](https://doi.org/10.5281/zenodo.6668878).

The VAC4EU data collection form below was based on this and modifications were made (in green), to make criteria more explicit and to adapt to the reality of RWD. This form was built subsequently in REDCAP and automated logic was applied to attribute the LOC.

The following changes were made to the original BC data collection form:

- Level 4 divided into level 4a and level 4b :
  - Level 4a for cases insufficient for LOC 1–3 but confirmed by a specialist (Criterion G = Yes).
  - Level 4b for cases insufficient for LOC 1–3 and not confirmed by a specialist.
- Introduced standard “Yes/No/Unknown” fields for all criteria to enable automated LOC assignment in REDCap.

Table . GBS data abstraction form

1. Record specific information, to the extent possible, for all column 1 criteria in the results column 2 below.
2. Use recorded results to circle most appropriate BCCD criterion value based on the formulae in column 3.

| **Clinical criteria** |  | **Results** | | | | | **3. BCCD criteria value determination** |
| --- | --- | --- | --- | --- | --- | --- | --- |
| Criteria A & B Flaccid (reduced tone) weakness (graded power of 4 or less – see Table 5 below) | * Wherever ‘yes’ is chosen, indicate the worst grade of muscle strength during course (See Table 5. Assessment of Muscle Strength) | | | | | | A=A-1 (bilateral flaccid paralysis) IF:  Both legs and/or both arms are weak or have a quantitative muscle strength <5  A=A-2 (absence of weakness) IF:  Both legs & both arms have normal muscle strength or graded strength = 5  Else A = Not met if neither A-1 nor A-2  B = B-1 IF Deep tendon reflexes are absent or decreased in weak limbs (essential for GBS)1,2  B = B-2 IF absent or reduced tendon reflexes in both legs and/or both arms despite absence of weakness  Else B = Not met if neither B-1 nor B-2 |
|  | R = right; L = left | 1.  R leg | 2.  L leg | 3.  R arm | 4.  L arm |
| **A-1. Qualitative muscle strength: N**=normal; **W**=weak; **Unknown=** not done, or unknown if done, or done but unknow in results |  |  |  |  |
| A-2. Quantitative muscle strength (0-5):  Lowest recorded score if available |  |  |  |  |
| **B. Deep tendon reflexes: A**=absent; **D**=decreased; **N**=normal; **I**=increased; **Unknown=** not done, or unknown if done, or done but unknow in results  **Leg: Kn**=knee; **Ank**=ankle  **Arm: Bi**=biceps; **Tri**=triceps; |  |  |  |  |
|  | | | | | |
| Criterion C Monophasic temporal illness pattern2 | 1. Is weakness onset date available ? Yes* No Not documented   *if Yes, provide details:(dd/mm/yy): / /   1. Is Date when weakness at its worst (nadir) available: Yes* No Not documented   *if Yes, provide details:(dd/mm/yy): / /  [ if (a) and (b) are Yes then option (c) will be displayed. Otherwise, the interval between (a) and (b) is unknown]   1. Interval between (a) and (b) :   Hrs* OR Days OR  * if same day record the interval in Hrs   1. **Date of last observation:** (dd/mm/yy): / / unknown 2. Clinical status at the last observation:   complete recovery to baseline status  partial recovery but still has some residual weakness / disability  no change in weakness from the nadir  dead   1. Fluctuation in degree of weakness between:   **1. onset and nadir*:**  Yes No Not documented | | | | | | C = YES IF: interval from onset to weakness nadir is between 12 hrs and 28 days  C = NO IF: interval from onset to weakness nadir is <12 hours OR >28 days  C = UNKNOWN IF: unable to calculate a value for interval from onset to weakness nadir |
| 2. nadir and last observation: Yes No Not documented  If ‘Yes’ for f-1 and/or f-2, were the fluctuations associated with disease modifying therapies (e.g. IVIG, steroids)? Yes* No not described  * if Yes, provide details: | | | | | |  |
| Criterion D Ophthalmo-paresis | 1. R extraocular muscle weakness: Yes No Not described 2. L extraocular muscle weakness: Yes No Not described | | | | | | **D = Present** IF yes for both R & L  **D = Absent** IF No for both R & L  **D = UNKNOWN** IF not described for R+/ or L |
| Criterion E Ataxia | **Ataxia**  Present Absent Not described | | | | | | E = Present or Absent if either is checked  **OR = UNKNOWN** IF Not described checked |
| Criterion F. Altered level of consciousness | Reduction or alteration of level of consciousness: Present  Absent  Not described | | | | | | **F = Present** or **Absent** if either is checked  **F = Unknown** IF Not described checked |
| Criterion G Corticospinal tract signs | **Corticospinal tract signs were:** Present Absent Not described, e.g., extensor plantar responses, spasticity, Increased muscle tone | | | | | | G = Present or Absent if either is checked  **G = Unknown** IF Not described is checked |
| Criterion H Alternative cause for weakness found 3 | Complete Table 6 checklist as completely as possible and then choose the best choice for the statement:  An identified alternative  **Diagnosis for weakness was:** Present* Absent (check if no testing done)  *Describe alternative cause and basis for diagnosis: | | | | | | H = circle whatever is checked  Present Absent |

| **Laboratory criteria** | **Results** |  |
| --- | --- | --- |
| Criterion I Electro- physiologic findings 4 | **Neurophysiologic testing:** DONE* Not Done Unknown if Done  or Results unavailable  *If DONE check the result that is most consistent with the report   1. Acute Inflammatory Demyelinating Polyneuropathy (AIDP) 2. Acute Motor Axonal Neuropathy (AMAN) 3. Acute Motor and Sensory Axonal Neuropathy (AMSAN) 4. Sensory abnormalities only 5. Inexcitable or unknown pattern 6. normal result 7. other (describe): | I = I-1 “Typical for GBS” IF a (AIDP) OR b (AMAN) or c (AMSAN) checked  **I = I-2** if d (sensory only) or f (normal) checked  **I = I-3** if testing Not done OR unknown if done OR results unavailable OR Done and e checked (inexcitable / unknown pattern).  NOTE: If g(other) checked, seek expert help for interpretation. |
| Criterion J Lumbar puncture (LP) and CSF exam | **Lumbar Puncture:** DONE* Not done Unknown if Done  * If DONE: Date (dd / mon / yy) / / )  **CSF protein** 5(mg/L if known ): Normal Elevated Unknown  **CSF total WBC count:**  <50 / uL ≥50/uL Unknown (actual  count in cells/uL if known ): | J = J-1 ‘cytoalbuminologic dissociation’ IF  CSF WBC < 50/uL and CSF protein elevated  J = J-2 IF CSF WBC <50/ul and CSF protein normal or result unknown  J = J-3 IF LP not done or done but CSF results unavailable  or ≥ 50/uL |
| Criterion K (Neurologist, Internist) | 1)Reported as a case of GBS by specialist, without details   - Yes - No   2) Reported as a case of MF by specialist, without details   - Yes - No |  |

1 For GBS absent/decreased DTRs must be demonstrated in the same limbs that are weak to meet the case definition; having absent/decreased DTRs in unaffected limbs does not impact the case definition.

2 Decreased/absent deep tendon reflex in non homologous muscles would be considered as bilateral and met B1

2 Monophasic illness patterns: “fluctuations in level of weakness, before reaching nadir, or during the plateau or improvement phases, occur in some cases, usually associated with use of disease-modifying therapies (steroids, IVIG, plasma exchange). Such fluctuations usually occur within the first 9 weeks after onset and are followed by eventual improvement”

3 Testing for alternate causes of weakness is not required to meet the case definition; but IF FOUND, then not a case.

4 Tests may be normal if done sooner than 7 days after weakness onset; in such cases should be repeated.

5 The normal CSF protein concentration ranges from 23 to 38 mg/dL (0.23 to 0.38 g/L) in adults*[[3]](#footnote-3)*

Use answers in data abstraction form and formulae below to determine level of certainty for GBS (4A) or Miller Fisher syndrome (4B) :

| Level of Certainty | 4A. GBS | |
| --- | --- | --- |
| Level 1 | [A = A1] & [B = B1] & [C=YES] AND [H = Absent] AND [I = I-1] AND [J = J-1] | |
| Level 2 | [A = A1] & [B = B1] & [C=YES] AND [H = Absent] AND | EITHER i. [I = I-1] AND [J = J-2 or J-3] OR ii. [I = I-3] AND [J = J-2] |
| Level 3 | [A = A1] & [B = B1] & [C=YES] AND [H = Absent] AND [I = I-3] AND [J = J-3] | |
| Level 4a | Reported as GBS but Insufficient information available to meet any level of case definition and K1= Yes | |
| Level 4b | Reported as GBS but Insufficient information available to meet any level of case definition and K1= No | |
| Level 5 | Not a case: [NO to A1, B1 or C] AND/OR [H = Present] | |

* if limb weakness (A = 1) is present the illness may be GBS/Miller Fisher overlap syndrome. If so, apply the criteria for GBS to determine level of diagnostic certainty.

| **Level of Certainty** | **4B. Miller Fisher syndrome*** | |
| --- | --- | --- |
| Level1 | [A=A2] & [B = B2] & [C =YES] & [D&E]=Present & ([F & G & H]=Absent) & [I = I-2] & [J = J1] | |
| Level2 | [A=A2] & [B = B2] & [C =YES OR UNKNOWN ] & [D&E]=Present & ([F & G & H]= Absent) AND | EITHER i. [I = I-2] AND [J = J-2 or J-3] OR ii. [I = I-3] AND [J = J-2] |
| Level3 | [A=A2] & [B = B2] & [C =YES OR UNKNOWN] & [D&E]=Present & ([F & G & H]= Absent) AND [I = I-3] AND [J = J-3] | |
| Level 4a | Reported as Miller Fisher Syndrome but insufficient information available to meet any level of case definition and K2=Yes | |
| Level 4b | Reported as Miller Fisher but Insufficient information available to meet any level of case definition and K2= No | |
| Level5 | Not a case : [NO to any of [A] AND [B-2 OR C] or Absent for [D or E] OR [Present for any of [F, G or H] | |

Criteria for Assessment of severity of weakness at clinical nadir and follow-up for outcome

Medical Research Council Manual Muscle Testing Scale

| **Grade** | **Muscular capability** |
| --- | --- |
| 0 | No contractile activity |
| 1 | Muscle activity can be palpated when performing action, with gravity eliminated |
| 2 | Patient can move limb with gravity eliminated through partial range of motion |
| 3 | Patient can’t hold against resistance, but is able to move limb against gravity through range of motion |
| 4 | Patient can hold the position against moderate resistance, has full range of motion |
| 5 | Patient can hold the position against maximal resistance and through complete range of motion |

Investigation(s) for alternative diagnoses for weakness: for any ‘yes’ answers: provide detail.

| Nervous system level | Investigated? | Alternative explanation for weakness | Present |
| --- | --- | --- | --- |
| Intracranial |  | Encephalitis, ADEM  Carcinomatous meningitis Brain stem stroke or encephalitis (Bickerstaff’s)  Wernicke’s encephalopathy (thiamine deficiency) | Yes No Unknown Yes No Unknown Yes No Unknown Yes No Unknown |
|  |
|  |
|  |
| Spinal cord |  | Infarct Myelitis Compression | Yes No Unknown Yes No Unknown Yes No Unknown |
|  |
|  |
| Anterior horn cells of spinal cord |  | Viral infection: Polio / VAPP, West Nile Virus, Zika Virus Amyotrophic lateral sclerosis  Progressive spinal muscular atrophy | Yes No Unknown Yes No Unknown Yes No Unknown |
|  |
|  |
| Spinal nerve roots |  | Chronic inflammatory demyelinating polyneuropathy (CIDP) Cauda equina compression | Yes No Unknown Yes No Unknown |
|  |
| Peripheral nerves |  | Metabolic derangements (magnesium, phosphates etc. ) Tick paralysis  Heavy metal toxicity (arsenic, gold or thallium)  Drug-induced neuropathy (vincristine, platinum, nitrofurantoin, paclitaxel) Porphyria  Critical illness neuropathy vasculitis  Diphtheria, Lyme disease,thiamine deficiency | Yes No Unknown Yes No Unknown Yes No Unknown Yes No Unknown Yes No Unknown Yes No Unknown Yes No Unknown Yes No Unknown  Yes No Unknown |
|  |
|  |
|  |
|  |
|  |
|  |
|  |
| Neuromuscular junction |  | Myasthenia gravis Organophosphate poisoning Botulism | Yes No Unknown Yes No Unknown Yes No Unknown |
|  |
|  |
| Muscle |  | Critical illness myopathy, polymyositis dermatomyositis  Hypo / hyperkalemia, rhabdomyolysis, mitochondrial disease | Yes No Unknown Yes No Unknown Yes No Unknown Yes No Unknown Yes No Unknown Yes No Unknown |
|  |
|  |
|  |
|  |
|  |

# Anaphylaxis

The BC case definition for anaphylaxis used was

Law B, Huang, WT, Sturkenboom, M. AESI Case Definition Companion Guide: Anaphylaxis Version 2. Zenodo; Oct 2022. DOI [10.5281/zenodo.6668844](https://doi.org/10.5281/zenodo.6668844).

The VAC4EU data extraction form below was based on this, but included changes (in green), to make criteria more explicit and more adapted to the reality of RWD. This form was built in REDCAP subsequently and automated logic was applied to calculate the LOC.

The following changes were implemented to the original Brighton Collaboration form:

- Added Criterion G for ‘Reported as a case of anaphylaxis by a specialist, without details’ (e.g., immunologist, emergency medicine physician, internist) to allow classification in cases where documentation in RWD is incomplete.
- Standardised “Yes/No/Unknown” options for all criteria to support automated logic execution in REDCap.
- Structured field to document whether an alternative diagnosis was found, with requirement to describe the alternative condition when present.
- Level 4 divided into Level 4a and Level 4b
  - Level 4a for cases insufficient for LOC 1–3 but confirmed by a specialist (Criterion G = Yes).
  - Level 4b for cases insufficient for LOC 1–3 and not confirmed by a specialist.

Table . Anaphylaxis data abstraction form

| Record date and time of onset of the first symptom or sign of anaphylaxis: | | |  |
| --- | --- | --- | --- |
| 1. Criterion A. Rapid progression of symptoms and signs | **i.** **Read** **this** **statement** **carefully:** From the start of symptoms or signs of possible anaphylaxis, there were multiple body systems involved (≥2 of skin, respiratory, cardiovascular or gastrointestinal) **OR** what started out involving 1 system spread to involve at least 1 other system within 1 hour of onset. | ii. Statement ‘i‘ is (choose the one best answer):  1. True  2. False  3. Unable to confirm as either true or false |
| 2. Criteria B. **Skin** symptoms or signs | Check all that were present of 1,2,3,4 or 5, OR choose only 6 or 7 depending on which is most accurate | 1. Urticaria (hives) at a location other than the vaccine administration site  2. Angioedema (skin swelling) at a location other than the vaccine administration site  3. Generalised (widespread) erythema (redness) of the skin WITH pruritis (itchiness of the skin)  4. Generalised (widespread) erythema (redness) of the skin WITHOUT pruritis (itchiness of the skin) 5. Bilateral red and itchy eyes that was new in onset  6. None of the above present 7. Unknown if any of 1-5 present |
| 3. Criteria C **Cardiac** symptoms or signs | Check one or both of 1 or 2 if present; OR choose either 3 or 4 depending on which is most accurate. | 1. Hypotension  2. Loss of consciousness  3. Neither 1 nor 2 were present  4. Unknown if 1 or 2 were present | |
| 4. Criteria D. **Respiratory** symptoms or signs | **D-1** Check all that were present of 1, 2, 3 and 4; OR choose either 5 or 6 depending on which is most accurate. | 1. Expiratory wheeze (when breathing out) documented by a healthcare professional, with or without a stethoscope  2. Inspiratory stridor (when breathing in) documented by a healthcare professional, with or without a stethoscope  3. Upper airways swelling of the tongue, pharynx (throat), uvula or larynx - unequivocally documented by a healthcare professional. *Note:* *isolated* *lip* *swelling,* *if* *present,* *is* *angioedema* *(see* *B2* *above)* *not* *upper* *airway* *swelling*  4. Cough or sneezing or runny nose that is new in onset and persistent (lasts ≥ 5 minutes or occurs repeatedly)  5. None of 1, 2, 3 or 4 were present  6. Unknown if any of 1, 2, 3 or 4 were present | |
| **D-2** Check all that were present of 1, 2, 3, 4, 5 and 6; OR choose either 7 or 8 depending on which is most accurate. | 1. Tachypnoea  2. Cyanosis  3. Grunting   4. Chest wall retractions   5. Increased use of accessory respiratory muscles   6. Measured hypoxia: oxygen saturation <90%   7. None of 1, 2, 3, 4, 5 or 6 presents   8. Unknown if any of 1, 2, 3, 4, 5 or 6 presents | |
| 5. Criterion E **Gastrointestinal** symptoms | Check one or both of 1, 2 if present; OR choose either 3 or 4 depending on which is most accurate. NOTE: these count towards anaphylaxis, ONLY in the context of an intranasally administered or injected vaccine. They are not relevant for oral vaccines. | 1 New onset vomiting (at least 2 episodes in infants <12 months of age) 2 New onset diarrhoea (at least 2 episodes in infants < 12 months of age) 3. Neither 1 nor 2 were present  4. Unknown if 1 or 2 were present | |
| 6. Criterion F **Mast cell tryptase** | Check best option | 1 Mast cell tryptase > upper limit of normal for lab doing test OR 1.2 times baseline measurement + 2ng/L  2 Mast cell tryptase not elevated, or not tested, or unknown if tested or results not available | |
| 7. Criterion G  **Case reported** (immunologist, emergency medicine physician, internist) | Check best option | Reported as a case of anaphylaxis by the specialist, without details  1. Yes  2. No | |
| 8. Criterion X  **Alternative diagnosis** | Check best option | 1 Yes, an alternative diagnosis was found that explained the acute illness, describe:  2 No, no alternative diagnosis was found to explain the acute illness | |

INTERPRETATION FORM FOR ANAPHYLAXIS CRITERION VALUES: Based on clinical data entered into data abstraction form, assign a value to each criterion using the rules in the options for criterion value columns.

| CRITERIA | | Options for criterion value | | | |  | Criterion Value |
| --- | --- | --- | --- | --- | --- | --- | --- |
|  | YES (Y) IF: | NO (N) IF: | UNKNOWN (U) IF: |
| Criterion A Rapid progression | | __A = 1 | __A = 2 | __A = 3 | A = Y N U |
| Criterion B Skin: | Major B-1 | __B = 1 or 2 or 3 | | __B = 4 or 5 or 6 AND B ne (1 or 2 or 3) | __B = 7 | B-1 = Y N U | |
| Minor B-2 | __B = 4 or 5 | | __B = 1 or 2 or 3 or 6 AND B ne (4 or 5) | __B = 7 | B-2 = Y N U | |
| Criterion C Cardiac Major: | | __C = 1 or 2 | | __C = 3 | __C = 4 | C = Y N U | |
| Criterion D Respiratory: | Major D-1 | __D-1 = (1 or 2 or 3) OR  __D-2 = ≥2 of (1, 2, 3, 4, 5 or 6) | | __D-1 = 5 AND D-2 = 7 OR  __D-1 = 5 AND D-2 = ≤1 of (1,2,3,4,5or6) | __D-1 = 6 & D-2 = 8 | D-1 = Y N U | |
| Minor D-3 | __D-1 = 4 | | __D-1 ne 4 OR D-1 = 5 | __D-1 = 6 | D-2 = Y N U | |
| Criterion E GI Major: | | __E = 1 or 2 | | __E = 3 | __E = 4 | E = Y N U | |
| Criterion F. Laboratory Major: | | __F = 1 | | Not applicable | __F = 2 | F = Y N U | |
| Criterion G. Case reported | | __G = 1 | | __G = 2 | Not applicable | G = Y N U | |
| Criterion X Alternative diagnosis | | __X = 1 | | __X = 2 | Not applicable | X = Y N U | |

Tabular algorithm to determine anaphylaxis v-2 level of certainty (LOC) based on criterion values

| Level of certainty | Anaphylaxis V-2 |
| --- | --- |
| Level 1 | A = Yes AND B-1 = Yes AND ≥1 OF (C or D-1 or E or F) = Yes |
| Level 2 | A = Yes AND B-1 = (No or Unknown) AND ≥2 of (C or D-1 or E or F) = Yes AND X=No |
| Level 3 | A = Yes AND B-1 = (No OR Unknown) AND X=No AND either of the following :  o 1 of (D-1) = Yes AND (B-2) = Yes  o 1 of (C or E or F) = Yes AND (B-2 or D-2) = Yes |
| Level 4a | Unable to meet any level of certainty (1, 2 or 3) because of insufficient information AND G=1 |
| Level 4b | Unable to meet any level of certainty (1, 2 or 3) because of insufficient information |
| Level 5 | A = No OR only a single system is involved (B or C or D or E or F) AND/OR X=Yes |

# Idiopathic thrombocytopenia (ITP)

The BC case definition for ITP used was :

Law B, Huang WT, Sturkenboom M. AESI Case Definition Companion Guide: Thrombocytopenia. Zenodo; Feb 2021. DOI 10.5281/zenodo.6668864

The VAC4EU form below has built on this with modifications (in green), to make criteria more explicit and to be adapted for the reality of RWD. This form was subsequently built in REDCAP and automated logic was applied to calculate LOC

The following changes are implemented to the original Brighton Collaboration form:

- Included Criterion E for ‘Reported as a case of ITP by a specialist, without details’ to classify cases with incomplete clinical or laboratory information in RWD.
- Clear specification of platelet count thresholds (<150 × 10^9/L)
- Inclusion of specific diagnostic evidence:
  - bone marrow cytology/histology findings
  - anti-platelet antibody positivity
  - high serum cytokine levels and/or abnormal liver function tests
  - medication history relevant to thrombocytopenia
  - surgical/pathological findings supporting the diagnosis
- Clear “Yes/No” fields for each criterion to enable automated LOC assignment in REDCap.
- Added Levels 4A and 4B to differentiate between specialist-confirmed cases without sufficient evidence and cases lacking sufficient evidence but not confirmed by a specialist.

Table . Idiopathic thrombocytopenia data abstraction form

| 1.Date of Thrombocytopenia |  |
| --- | --- |
| 2. Hospital admission? (no/yes, date_) |  |
| 3. Admitting diagnosis: |  |
| 4. Discharge diagnosis: |  |
| A-Decreased platelet count | - **1.** count <150X109/L - **2.** count ≥ 150X109/L - **3.** no count done OR results unknown   How was the platelet count done:   - not recorded - automated hematology analyser - cell count slide - Other. Describe ____   Lowest recorded platelet count X 109 / L:____ |
| B - Peripheral blood smear | - **1.**reduced platelet numbers with no clumping seen - **2.** normal platelet numbers or clumping seen - **3.** smear not done or results unavailable |
| C- Clinical symptoms or signs indicating spontaneous bleeding | - **C1.** ≥ 1 the below symptom/sign confirmed to be present. - Purpura - Petechia - Bruising - Hematoma - Epistaxis - Hematuria - Hematemesis - Hematochezia - Occult rectal bleeding - Hemorrhagic oozing of skin lesion - Conjunctival bleeding - Intracranial bleeding - Vaginal bleeding (unless menstruation) - **C2**. No clinical evidence of spontaneous bleeding - **C3.** No documentation of any symptoms/signs of spontaneous bleeding |
| D-Laboratory examination | - **D1. ≥ 1 the below confirmed the causality of event.**  1. Bone marrow cytology and histology: please describe   (A shift to young, immature, less polyploid megakaryocytes and fewer mature megakaryocytes)   1. Anti-platelet antibodies positive 2. High serum cytokine levels AND/OR abnormal liver function tests 3. Medication history: e.g. heparin, warfarin, rituximab, clopidogrel, ticlopidine, chemotherapy medications. 4. Surgical and/or pathological findings and diagnoses: please describe ……  - **D2**. No examination done, unknown if done, or done but results unknown |
| E-Specialist diagnosis (hematologist, internist) | Reported as a case of Idiopathic thrombocytopenia by specialist, without details  Yes  No |

| **1** | A1= YES AND [B1 OR C1 = YES] AND D1= NO |
| --- | --- |
| **2** | A1 = YES AND [B2 or B3] AND [C2 or C3] AND D1= NO AND level5 = NO |
| **3** | Not applicable |
| 4-A | E=YES AND level 5 = NO |
| 4-B | **Reported** thrombocytopenia with insufficient evidence to meet the case definition**AND/OR** **D2 = YES AND level 5 = NO** |
| **5** | A2 AND/OR D1= YES AND level1 = NO |

# Transverse myelitis

The BC case definition for transverse myelitisused was

Law B, Chen R, Huang WT. AESI Case Definition Companion Guide: Myelitis. Zenodo; Feb 2021. DOI [10.5281/zenodo.6668654](https://doi.org/10.5281/zenodo.6668654).

The VAC4EU data collection form below was based on this with modifications (in green), to make criteria more explicit and to adapt for the reality of RWD. This form was subsequently built in REDCAP and automated logic was applied to calculate LOC.

The following changes were implemented to the original Brighton Collaboration form:

- Inclusion of a criterion for ‘Reported case of transverse myelitis by a specialist without details’ to classify cases with incomplete documentation.
- Standardised ‘Yes/No/Unknown’ responses for all criteria to support automated LOC assignment in REDCap.
- LOC sublevels (4A, 4B) to distinguish between insufficient evidence with and without specialist confirmation
- Added ‘**both sides of one section of the spinal cord**‘ to criterion A3, E5 and F2— this phrasing was added to improve precision of the definition and ensure consistent interpretation — versus other abnormalities.

Table . Transverse myelitis data abstraction form

| **A3.** Spinal cord histopathology | Spinal cord biopsy results: check all that apply below   - 1-acute inflammation of both sides of one section of the spinal cord - 2-meningeal involvement in the inflammation - 3_normal histopathology - 4_Other- describe: - 5-Biopsy not done OR biopsy done results unknown OR unknown if Biopsy done | |
| --- | --- | --- |
| **D.** Spinal cord symptoms / signs | **D1** Limb weakness with upper motor neuron damage | - Yes (check all that apply below) - Increased muscle tone - spasticity - muscle rigidity - hyperreflexia - Other-describe - No - Not tested - Unknown |
|  | **D2** Limb weakness with evidence for lower motor neuron damage present | - Yes(check all that apply below) - Decreased muscle tone - Flaccid paralysis / weakness - Decreased or absent deep tendon Reflexes - Fasciculations - Muscle atrophy - Other-describe - No - Not tested - Unknown |
| **D3** Sensory level | - Yes (indicate level if able)__________ - No - Not tested - Unknown | |
| **D4** Autonomic dysfunction (can be any 1 of a, b or c) | - a. Bowel dysfunction: - Yes-describe below - No - Unknown - b. Bladder dysfunction: - Yes-describe below - No - Unknown - c. Erectile dysfunction: - Yes-describe below - No - Unknown | |

Spine neuroimaging caveat: If both spine CT and MRI were done and the results differ, seek expert help to decide which most accurately reflects presence or absence of inflammation and/or demyelination consistent with myelitis.

Neuroimaging: Check best option for E5 & F2; if >1 examination, record most abnormal result; use extra pages to record other test dates and results, if applicable

| **E.** Indicators of CNS inflammation | E1.Fever | - Fever temperature ≥ 38.0C by any measured method (history of fever is insufficient)   highest temp:____   - No - Unknown |
| --- | --- | --- |
| E2.CSF | - Collected – Provide results below (sample date dd/mm/yy: __/___/__)  | CSF parameter | Result | | Not tested or no result | | --- | --- | --- | --- | | Opening/closing pressure(mmHg) |  | |  | | White blood cell count (cells/µL) | If age <2months  •Yes If >15 WBC/µL  •No If ≤15 WBC/µL | If age>2months  •Yes if >5 WBC/µL  No if ≤ 5 WBC/µL |  | | RBC count (cells/µL) |  | |  | | Protein (mg/dL |  | |  | | Glucose (mg/dL |  | |  | | Gram stain |  | |  | | Rapid antigen test |  | |  | | Culture, other (describe): |  | |  |  - Not collected - Unknown (cultureother (describe) |
| Neuroimaging | E5.Spinal CT | - 0. Not done or done but results unavailable or unknown if done - 1. Evidence of acute inflammation of both side of one section of the spinal cord - 2. Normal - 3. Not normal but no evidence of acute inflammation of both side of one section of the spinal cord - 4. Other (Describe) |
|  | F2.Spinal MRI | - 0. Not done or done but results unavailable or unknown if done - Evidence of acute inflammation of both side of one section of the spinal cord - 2. Normal - 3. Not normal but no evidence of acute inflammation of both side of one section of the spinal cord - 4. Other (Describe) |

| G. Specialist diagnosis (**neurologist,** infectious disease specialist, immunologist, internist) | Reported case of transverse myelitis by specialist but without details |
| --- | --- |
| X1.Exclusion criterion | Alternative diagnosis for illness   - Yes   *If yes describe, e.g. neoplasm, vascular disorder, infection, toxic/metabolic encephalopathy   - No - Unknown |

| Level 1 | A3 = 1 |
| --- | --- |
| Level 2 | D = YES (IF ≥ 1 of (D1, D2, D3 or D4)) AND E ≥2 AND X1 = NOT MET |
| Level 3-A | D = YES AND E = 1 AND X1 = NOT MET |
| Level3-B |  |
| Level 4-A | Reported case of acute myelitis with insufficient evidence to meet the case definition  And G=YES |
| Level4-B | Reported case of acute myelitis with insufficient evidence to meet the case definition |
| Level 5 (Not a case) | D = NO AND/OR E = 0 AND/OR X1 = MET |

**Total indicators of CNS inflammation:**

**E =** 0 : if NO / UNKNOWN for E1 + E2 + E5 + F21: if YES for only 1 of [E1 or E2 or E5 or F2]≥2: if YES for ≥2 of [E1 or E2 or E5 or F2]

# Major congenital anomalies

The BC case definition for major congenital anomaliesused was:

DeSilva M, Munoz FM, Mcmillan M, Kawai AT, Marshall H, Macartney KK, Joshi J, Oneko M, Rose AE, Dolk H, Trotta F, Spiegel H, Tomczyk S, Shrestha A, Kochhar S, Kharbanda EO; Brighton Collaboration Congenital Anomalies Working Group. Congenital anomalies: Case definition and guidelines for data collection, analysis, and presentation of immunization safety data. Vaccine. 2016:34(49):6015-6026. doi: 10.1016/j.vaccine.2016.03.047.

The Brighton Collaboration case definition was reformatted into **three separate forms** to improve clarity and facilitate structured data abstraction using RWD:

- Major major external structural congenital anomalies form
- Major major internal structural congenital anomalies form
- Major major functional congenital anomalies form

Table . Major major external structural congenital anomalies data abstraction form

Was the case tagged with major external structural congenital anomalies?

- Yes, then answer the following question and use sheet 1
- No

If yes, please select at least one of the items listed below :

| Stillbirths |  |
| --- | --- |
| Conjoined twins |  |
| **Central nervous system anomalies** | |
| Neural tube defects |  |
| Anencephalus & similar anomalies |  |
| Spina bifida |  |
| Encephalocele |  |
| Microcephalus & brain reduction |  |
| Congenital hydrocephalus |  |
| Craniorachischisis |  |
| Iniencephaly |  |
| Other specified & unspecified CNS anomalies | Please describe |
| Holoprosencephaly |  |
| **Eye anomalies** | |
| Anophthalmos, microphthalmos |  |
| Congenital cataract |  |
| Congenital glaucoma |  |
| Other eye anomalies | Please describe |
| **Ear face & neck anomalies** | |
| Anotia/microtia |  |
| Anomalies of ear causing impairment |  |
| Other ear anomalies | Please describe |
| Anomalies of face & neck |  |
| **Respiratory system anomalies** | |
| Nose anomalies |  |
| Other respiratory system anomalies | Please describe |
| Choanal atresia |  |
| Cleft lip and palate |  |
| Cleft palate alone (without cleft lip) |  |
| Cleft lip alone (without cleft palate) |  |
| Cleft palate with cleft lip |  |
| **Genital organ anomalies** | |
| Hypospadias, epispadias |  |
| Indeterminate sex |  |
| Other genital organ anomalies | Please describe |
| **Urinary system anomalies** | |
| Bladder exstrophy |  |
| Cloacal exstrophy |  |
| Other urinary system anomalies | Please describe |
| **Musculoskeletal anomalies** | |
| Certain musculoskeletal anomalies |  |
| Clubfoot (talipes equinovarus) |  |
| Polydactyly, syndactyly |  |
| Craniosynostosis |  |
| Gastroschisis |  |
| Omphalocele |  |
| Exomphalos |  |
| Limb reduction anomalies |  |
| Skeletal dysplasia |  |
| Congenital absence of finger(s) |  |
| Other, unspecified limb anomalies | Please describe |
| Congenital constriction bands/amniotic band |  |
| Anomalies of abdominal wall |  |
| Other musculoskeletal anomalies | Please describe |
| Anomalies of integument |  |
| Other selected | Please describe |
| Congenital syphilis syndrome |  |
| Congenital rubella syndrome |  |
| Fetal alcohol syndrome |  |
| Non-immune fetal hydrops |  |
| Haemangioma |  |
| Lymphangioma |  |
| Congenital skin disorders |  |
| Other & unspecified anomalies | Please describe |
| Lateral anomalies |  |
| Teratogenic syndromes with malformations |  |

| 1. Date of diagnosis of the malformation |  |
| --- | --- |
| 2. Hospital admission? |  |
| 3. Admitting diagnosis: |  |
| 4. Discharge diagnosis: |  |

**Condition A**

Alterations in external anatomy visible at the time of ***live birth*** and persistent beyond the immediate ***peripartum period*** unless surgically repaired.

- Yes, then answer condition D
- No

**Condition B**

Alterations in external anatomy visible in a ***stillbirth*** or in the products of conception of a spontaneous or ***therapeutic abortion***

- Yes, then answer condition D
- No

**Condition C**

Alterations in external anatomy visible in a [stillbirth](https://www.sciencedirect.com/topics/medicine-and-dentistry/stillbirth) or in the products of conception of a spontaneous or abortion. (If products of conception cannot be used for detailed morphologic exam)

- Yes, then answer condition D
- No

**Condition D**

**D1**

Confirmed by documentation of a diagnosis made by a clinician experienced in diagnosing congenital anomalies and with the highest level of morphology training for the specific setting. (geneticists, neonatologists, [pathologists](https://www.sciencedirect.com/topics/medicine-and-dentistry/pathologist), or other relevant subspecialists)

- Yes
- No

**D2**

Confirmed by documentation of a diagnosis made by a clinician with some experience diagnosing congenital anomalies. (physicians, nurse practitioners, or physician assistants trained in pediatrics, obstetrics, or family medicine)

- Yes
- No

**D3**

Confirmed by documentation of a diagnosis made by a trained maternal or child healthcare provider with at least minimal experience diagnosing congenital anomalies

- Yes
- No

**Condition E**

For live births, confirmed using individual (ICD-9/ICD-10) codes or as part of an ICD-9/ICD-10 code based algorithm, where the outcome (individual code or algorithm) was validated

- Yes
- No

| Level 1 | [YES to A OR B] AND [ YES to D1] |
| --- | --- |
| Level 2 | [YES to A OR B] AND [ YES to D2] |
| Level 3 | [YES to A OR C] AND [ YES to D3 OR E] |
| Level 4 | Reported as a case but fails to meet any level of certainty |

Table . Major major internal structural congenital anomalies data abstraction form

Is the case tagged with internal structural congenital anomalies?

- Yes, then answer the following question and use sheet 1
- No

If yes, please select at least one of the items listed below :

| **Congenital heart defects** | |
| --- | --- |
| Aortic valve stenosis |  |
| Common truncus (truncus arteriosus or TA) |  |
| Transposition of great vessels |  |
| Tetralogy of Fallot |  |
| Interrupted aortic arch (IAA) |  |
| Double outlet right ventricle (DORV) |  |
| Common ventricle (Single ventricle) |  |
| Ventricular septal defect |  |
| Atrial septal defect |  |
| Atrioventricular septal defect (Endocardial cushion defects) |  |
| Tricuspid valve atresia and stenosis |  |
| Mitral valve anomalies |  |
| Other septal closure defects |  |
| Heart valve anomalies |  |
| Pulmonary valve atresia and stenosis |  |
| Hypoplastic left heart syndrome |  |
| Hypoplastic right heart |  |
| Ebstein anomaly |  |
| Other heart anomalies |  |
| Circulatory system anomalies |  |
| Coarctation of aorta |  |
| Patent ductus arteriosus |  |
| Other anomalies of aorta |  |
| Total anomalous pulmonary venous connection (TAPVC) |  |
| Pulmonary artery anomalies |  |
| Patent Ductus Arteriosus as only CHD in term infants (>=37 weeks) |  |
| Situs inversus |  |
| Other circulatory system anomalies | Please describe |
| **Respiratory system anomalies** | |
| Nose anomalies |  |
| Lung agenesis & hypoplasia |  |
| Cystic adenomatous malformation of lung |  |
| Other respiratory system anomalies | Please describe |
| Choanal atresia |  |
| Cleft lip and palate |  |
| Cleft palate alone (without cleft lip) |  |
| Cleft lip alone (without cleft palate) |  |
| Cleft palate with cleft lip |  |
| **Digestive system anomalies** | |
| tracheo-esophageal fistula, esophageal atresia & stenosis |  |
| Biliary atresia |  |
| Other upper alimentary tract anomalies | Please descibe |
| Intestinal, anorectal atresia & stenosis |  |
| rectal and large intestinal atresia/stenosis |  |
| duodenal atresia or stenosis |  |
| small intestinal atresia/stenosis |  |
| Pyloric stenosis |  |
| Hirschsprung disease |  |
| Atresia of bile ducts |  |
| Annular pancreas |  |
| Other digestive system anomalies | Please describe |
| **Urinary system anomalies** | |
| Renal agenesis/hypoplasia & dysgenesis |  |
| Congenital posterior urethral valves |  |
| Undescended testicle |  |
| Vesico-ureteric reflux |  |
| Cystic kidney disease |  |
| Multicystic renal dysplasia |  |
| Congenital hydronephrosis |  |
| Other urinary system anomalies | Please describe |
| **Musculoskeletal anomalies** | |
| Certain musculoskeletal anomalies |  |
| Congenital dislocation of hip/developmental dysplasia of hip |  |
| Diaphragmatic hernia |  |
| **Other selected congenital anomalies** | |
| Congenital syphilis syndrome |  |
| Congenital rubella syndrome |  |
| Maternal infections resulting in malformations |  |
| Fetal alcohol syndrome |  |
| Valproate syndrome |  |
| Non-immune fetal hydrops |  |
| Haemangioma |  |
| Lymphangioma |  |
| Vascular disruption anomalies |  |
| VATER/VACTERL  defects |  |
| Other and unspecified anomalies | Please describe |

| 1. Date of diagnosis of the malformation |  |
| --- | --- |
| 2. Hospital admission? |  |
| 3. Admitting diagnosis: |  |
| 4. Discharge diagnosis: |  |

**Condition A**

Alterations in internal anatomy present at the time of ***live birth**** and persistent beyond the immediate peripartum period unless surgically repaired

- Yes, then answer condition F
- No

**Condition B**

Alterations in internal anatomy detected during autopsy for a ***stillbirth, spontaneous or therapeutic abortion*** confirmed by documentation by a pathologist or other relevant subspecialist.

- Yes
- No

**Condition C**

For ***stillbirth, spontaneous or therapeutic abortion***, internal structural defect was visible by ultrasound or other imaging modality prenatally

- Yes, then answer condition F
- No

**Condition D**

Alterations in internal anatomy present at the time of stillbirth, spontaneous abortion, or induced abortion.

- Yes, then answer condition F
- No

**Condition E**

For live births, confirmed using individual (ICD-9/ICD-10) codes or as part of an ICD-9/ICD-10 code based algorithm, where the outcome (individual code or algorithm) has been validated

- Yes
- No

**Condition F**

**F1**

Confirmed by definitive imaging study or intraoperative diagnosis

- Yes
- No

**F2**

Confirmed by documentation of a diagnosis made by a clinician experienced in diagnosing congenital anomalies and with the highest level of morphology training for the specific setting without definitive imaging or intraoperative evaluation. (geneticists, neonatologists, pathologists, or other relevant specialists)

- Yes
- No

**F3**

Confirmed by documentation of a diagnosis made by a clinician with some experience diagnosing congenital anomalies ( physicians, nurse practitioners, or physician assistants trained in pediatrics, obstetrics, or family medicine)

- Yes
- No

| Level 1 | [YES to A] AND [ YES to F1 OR B] |
| --- | --- |
| Level 2 | [YES to A] AND [ YES to F2 OR C] |
| Level 3 | [YES to A] AND [ YES to F3 OR E] |
| Level 4 | Reported as a case but fails to meet any level of certainty |

Table . Major functional congenital anomalies data abstraction form

Is the case tagged with functional congenital anomalies?

- Yes, then answer the following question and use sheet 1
- No

If yes, please select at least one of the items listed below :

| Down syndrome |  |
| --- | --- |
| Trisomy 13 |  |
| Trisomy 18 |  |
| Deletion 22 q11 |  |
| Autosomal syndromes |  |
| Other sex chromosome conditions | Please describe |
| Turner syndrome |  |
| Klinefelter syndrome |  |
| Fragile X syndrome |  |
| Achondroplasia |  |
| Osteogenesis imperfecta |  |
| Genetic syndromes + microdeletions |  |
| Other & unspecified anomalies | Please describe |
| Congenital hypothyroidism |  |
| Phenylketonuria |  |
| Galactosaemia |  |
| Albinism |  |
| Cystic fibrosis |  |
| Other metabolic disorders |  |
| **Hematological/Immune** | |
| Haemolytic anaemias |  |
| Thalassaemias |  |
| Down syndrome |  |
| Coagulation defects |  |

| 1. Date of diagnosis of the malformation |  |
| --- | --- |
| 2. Hospital admission? |  |
| 3. Admitting diagnosis: |  |
| 4. Discharge diagnosis: |  |

**Condition A**

Alterations in functioning of one or more organs or body parts for live birth:

- -Not due to a structural defect
- -Present at the time of birth (or propensity to develop alteration present at live birth)
- -Persistent beyond the immediate peripartum period, unless treated through gene therapy or stem cell transplantation
- Yes, then answer condition C
- No

**Condition B**

Alterations in functioning of one or more organs or body parts, not due to a structural defect for a ***stillbirth, spontaneous or therapeutic abortion***

- Yes, then answer condition C
- No

**Condition C**

**C1**

Confirmed by definitive diagnostic study

- Yes
- No

**C2**

Confirmed by documentation of a diagnosis made by a clinician experienced in diagnosing congenital anomalies and with the highest level of training in the diagnosis of functional defects for the specific setting (geneticists, neonatologists, pathologists, or other relevant subspecialists)

- Yes
- No

**C3**

Confirmed by documentation of a diagnosis made by a clinician with some experience diagnosing functional defects (physicians, nurse practitioners, or physician assistants trained in pediatrics, obstetrics, or family medicine)

- Yes
- No

**Condition D**

Confirmed using individual (ICD-9/ICD-10) codes or as part of an ICD-9/ICD-10 code-based algorithm, where the outcome (individual code or algorithm) has been validated

- Yes
- No

| Level 1 | [YES to A OR B] AND [ YES to C1] |
| --- | --- |
| Level 2 | [YES to A OR B] AND [ YES to C2] |
| Level 3 | [YES to A OR B] AND [ YES to C3 OR D] |
| Level 4 | Reported as a case but failed to meet any level of certainty |

# Narcolepsy

The BC case definition for narcolepsyused was:

Francesca Poli, Sebastiaan Overeem, Gert Jan Lammers, Giuseppe Plazzi, Michel Lecendreux, Claudio L. Bassetti, Yves Dauvilliers, Daniel Keene, Ramin Khatami, Yulin Li, Geert Mayer, Hanna Nohynek, Barbara Pahud, Teresa Paiva, Markku Partinen, Thomas E. Scammell, Tom Shimabukuro, Miriam Sturkenboom, Kristy van Dinther, Max Wiznitzer, Jan Bonhoeffer. Narcolepsy as an adverse event following immunization: Case definition and guidelines for data collection, analysis and presentation. Vaccine. 2013;31(6):994-1007. doi: 10.1016/j.vaccine.2012.12.014.

The data collection form below was taken from this case defintion without any modifications.

Table 10. Narcolepsy data abstraction form

| 1. Date of illness onset |  |
| --- | --- |
| 2. Hospital admission? |  |
| 3. Admitting diagnosis: |  |
| 4. Discharge diagnosis: |  |
| A.  CSF hypocretin-1 deficiency | 1. Hypocretin-1 concentration below 110 pg/mL in crude, unextracted CSF  2. Measured by the Phoenix radioimmunoassay  3. Performed in a laboratory according to published guidelines and by using the Stanford reference sample1,2  4. Not done, or unknown if done,or done but unknow in results |
| B-1 Excessive daytime sleepiness | 1. Unintended sleep episodes during the day 2. Present almost daily for at least one month 3. An increase in daytime sleep episodes 4. Present almost daily for at least one month |
| B-2 Unambiguous cataplexy | 1. Sudden AND unexpected onset of episodes 2. Partial or generalised muscle weakness 3. Preserved consciousness 4. Clear emotional trigger in ≥2 episodes 5. Duration of <30 s 6. Episodes with documented, reversible areflexia 7. Partial or generalised seizure 8. Neuromuscular disordersa 9. Loss of muscle tone, e.g., falling during routine activity (i.e. while walking or running), wide-based gait, head droops, prominent facial involvement resulting in “cataplectic facies,” eyelid ptosis, mouth opening, tongue protrusion, facial weakness, facial grimacing, abnormal postures, swaying of the head and trunk, stereotypic movements or chorea-like patterns. Hypotonia and wide-based gait may also be disclosed at neurological examination 10. Duration of episodes is a few seconds to several minutes (sometimes present in protracted clusters if emotional triggers continue) 11. Any other known explanation |
| C.MSLTb **(**Multi Sleep Latency Test) | 1. MSLT mean sleep latency ≤8 min in adults OR MSLT mean sleep latency≤12 min in children and adolescents 2. MSLT SOREMP 3≥ 2 |

| **CRITERIA** | **Criterion = Yes(Y) if:** |
| --- | --- |
| CSF hypocretin-1 deficiency | A1 and A2 and A3: Yes |
| Excessive daytime sleepiness  In adults (≥16 years) | B-1.1 and B-1.2: Yes |
| Excessive daytime sleepiness  In children and adolescents (<16 years) | B-1.3, B-1.4: Yes |
| Unambiguous cataplexy in adults (≥16 years) | B-2.1, B-2.2, B-2.3, B-2.4, B-2.5: Yes and B-2.7, B-2.8: No |
| B-2.1, B-2.6, B-2.5: Yes and B-2.7, B-2.8: No |
| Unambiguous cataplexy in children and adolescents (<16 years)4 | Episodes of cataplexy that fulfill the criteria for adult cataplexy |
| B-2.1, B-2.3, B-2.9, B-2.10: Yes and B-2.7, B-2.8, B-2.11: NO |
| MSLT | C1 or C2: Yes |

| Level 1 | YES to A and YES to B1 or B2 |
| --- | --- |
| Level 2 | B1 = YES and B2 = YES and C= YES |
| Level 3 | B1 = YES and C1= YES and C2=Yes |
| Level4 | If there is insufficient information to determine the conditions needed to a level of certainty of 1, 2 or 3 and X= No |
| Level 5 (Not a case) | If there is insufficient information to determine the conditions needed to a level of certainty of 1, 2 or 3 and X= YES |

 X: All levels AND in the absence of other mimicking disorders:

According to ICSD-2 criteria:

- sleep related disorder breathing
- behaviorally induced insufficient sleep
- circadian rhythm disorders
- recurrent hypersomnias secondary to medical or psychiatric conditions
- use of sedating medication and antidepressants
- focal cerebral lesions, indicated by neurological examination and/or brain imaging

**a:** symptoms: muscular weakness, muscular cramps, breathing difficulties, swallowing difficulties

- muscle pain,

Classification of neuromuscular disorders:

1. Motor neuron disease
2. Neuropathy
3. Neuromuscular junction disorders: like myasthenia gravis
4. muscular dystrophies

**b**: 4 or 5 nap MSLT performed according to the American Academy of Sleep Medicine (AASM) protocol5

# Cerebral venous sinus thrombosis

The VAC4EU J&J COVID-19 vaccine study has developed a case definition that support the validation of the events of CVST identified in the study.

As of March 2023, there appears to be no standard case definition to study CVST following vaccination. The approach proposed to validate this outcome will use a 365-day clean look-back period to define “new” diagnoses.

**Table 11. CVST data abstraction form**

| Confirmation of CVST | A-1 Pathologic findings from autopsy | Check the one best answer and provide details as appropriate:   - 1. Autopsy showed presence of CVST: (give date of autopsy and brief description in terms of the pathologic proof of CVST if present) - 2. Autopsy done but did not show evidence of CVST - 3. No autopsy done, unknown if done, or done but results unavailable. |
| --- | --- | --- |
| A-2 Surgical procedure | Check the one best answer and provide added details as appropriate:   - 1. Endovascular thrombectomy performed - 2. Other or unspecified procedure done that confirmed presence of CVST* - 3. No surgical procedure done; or done but either did not confirm presence of CVST or findings unknown; or unknown if done   * If 2 checked, provide available details: _____________________________  ___________________________________________________________________ |
| A-3 Imaging studies confirmed the presence of CVST | A-3.1 Choose the one best answer   - 1. ≥1 imaging study was done and confirmed a CVST (if yes answer A-3.2 below) - 2. ≥1 Imaging study was done but didn’t confirm CVST - 3. No imaging studies done, unknown if done, or done but results unknown |
| A-3.2 If option 1 chosen for A-3.1, which studies confirmed a CVST? Check all that apply   - 1. Computerized tomography (CT) with contrast enhanced venography - 2. MRI with contrast enhanced venography - 3.Non-contrast CT or MRI - 4. Catheter-based angiography - 5. Other – Describe: |
| A-3.3 Describe location(s) of the CVST based on imaging study recorded in A-3.2: |
| Criterion B: Clinical evidence for presence of a CVST | B-1 Reported CVST syndrome | Choose the one best answer:   - 1.CVST was reported. (If yes, answer B-1.2 below) - 2. There was no report of a recognized CVST |
| B-2 New onset clinical symptoms or signs that could suggest a CVST | Check all that apply:   - 1. Acute or subacute headache - 2. Periorbital and forehead pain - 3. Ocular chemosis - 2. Loss of, or change in, level of consciousness - 3. Seizure(s) - 4. Fluctuating focal neurologic abnormalities (e.g., facial paralysis, difficulty with speech, ataxic gait, hemiparesis, abnormal eye movements, blurred vision or seeing double) - 5. Papilledema - 6. Bilateral cranial nerve palsies (third, fourth, fifth and/or sixth cranial nerves)   7. None of the above were present or it is unknown if any of 1-6 were present |
| Criterion X:  Alternative diagnosis | Choose the best answer   - 1. An alternative diagnosis was found that explained the acute illness, describe:   _________________________________________________________________________  2. No alternative diagnosis was found to explain the acute illness | |

| CRITERIA | CRITERION OPTIONS | | | Criterion  Value |
| --- | --- | --- | --- | --- |
| Criterion=YES (Y) IF: | Criterion=NO (N) IF: | Criterion=UNKNOWN (U) IF: |
| CVST:  A-1: Confirmed by pathology | __A-1 = 1 | __A-1 = 2 | __A-1 = 3 | A-1 = Y N U |
| A-2: Confirmed by surgical procedure | __A-2 = 1 - 2 | __A-2 = 3 | | A-2 = Y N/U |
| A-3: Confirmed by imaging. | __A-3.1 = 1 and A-3.2 = ≥1 of (1-4) | __A3.1 = 2 | __A-3.1 = 3 | A-3 = Y N U |
| B-1: CVST syndrome reported | __B-1 = 1 | __B-1 = 2 | | B-1 = Y N U |
| B-2: ≥1 clinical symptom or sign | __B-2 ≥1 of (1-6) | __ B-2 = 7 | | B-2 = Y N/U |
| X. Alternative diagnosis | __X = 1 | __X = 2 | Not applicable | X = Y N |

| Level of Certainty |  |
| --- | --- |
| Level 1 | A-1 OR A-2 OR A-3 = YES |
| Level 2 | [B-1 AND B-2= YES] AND X = NO |
| Level 3 | [B-1 = YES] or [ B-2≥ 3] AND X = NO |
| Level 4a | Not applicable |
| Level 4b | Reported as a case of CVST but fails to meet any level of certainty |
| Level 5 | An alternative diagnosis to account for the clinical illness was found (X = YES) |

# Deep Vein Thrombosis (DVT)

The VAC4EU J&J COVID-19 vaccine study has developed a case definition that support the validation of the events of DVT identified in the study.

As of March 2023, there appears to be no standard case definition to study DVT following vaccination. The approach proposed to validate this outcome will follow the same approach used for DVT as a component of TTS. It will use a 365-day clean look-back period to define “new” diagnoses.

| Criterion A Confirmation of DVT | A-1 Pathologic findings from autopsy | Check the one best answer and provide details as appropriate:   - 1. Autopsy showed presence of DVT: (give date of autopsy and brief description in terms of the pathologic proof of DVT or both if present) - 2. Autopsy done but showed no evidence of DVT - 3. No autopsy done, unknown if done, or done but results unavailable. |
| --- | --- | --- |
| A-2 Surgical procedure | Check the one best answer and provide added details as appropriate:   - 1. Thrombectomy related to DVT performed* - 2. Other procedure done that confirmed presence of DVT* - 3. No surgical procedure done; or, done but either did not confirm presence of DVT or findings unknown; or unknown if done   * If 1 or 2 checked describe procedure, location and finding: |
| A-3 Imaging studies confirmed the presence of DVT | A-3.1 Choose the one best answer   - 1. ≥1 imaging study was done and confirmed DVT (if yes answer A-3.2 below) - 2. ≥1 Imaging study was done but didn’t confirm DVT - 3. No imaging studies done, unknown if done, or done but results unknown |
| A-3.2 If option 1 chosen for A-3.1, which studies confirmed DVT? Check all that apply   - 1. Compression ultrasonography - 2. CT or MR venography - 3. Contrast venography - 4. Doppler/Duplex Ultrasound - 5. Other – Describe: |
| A-3.2 Describe location(s) of DVT based on imaging study: |
| Criterion B: Clinical evidence for presence of DVT | B-1.1 Signs and symptoms of DVT reported | Choose the one best answer:   - 1. ≥1 symptom or sign of DVT was reported. (If yes, answer B-1.2 and B2 below) - 2. There was no report of a recognized DVT syndrome - 3. It is unknown if there was a report of a DVT syndrome |
| B-1.2 Specific type(s) of DVT | Check all that apply:   - 1. Lower extremity DVT - 2. Upper extremity DVT |
| B-2 New onset clinical symptoms or signs that could suggest DVT | Check all that apply:   - 1. Calf pain or tenderness - 2. leg swelling or pitting edema - 3. Absent pulses in legs or arms - 4. Redness, warmth, or pain in one or more extremities - 5. None of the above were present or it is unknown if any of 1-4 were present |

Table 12. DVT data abstraction form

| Criterion C  D-Dimer | Choose the one best answer:   - 1. D-dimer exceeded test lab’s upper limit of normal.   What was the highest measured value within 2 weeks before and 2 weeks after the date of the event under validation? ___________________________________________  If known, please indicate the test lab’s upper limit of normal:   - 2. D-dimer tested and was within test lab’s range of normal - 3. D-dimer not tested, or tested but results unknown or not available |
| --- | --- |
| Condition F | Reported as a case of DVT by specialist, without details   - Yes - No |
| Criterion X: Alternative diagnosis | Choose the one best answer   - 1. An alternative diagnosis was found that explained the acute illness. describe:   ____________________________________________________________________  2. No alternative diagnosis was found to explain the acute illness |

| CRITERIA | CRITERION OPTIONS | | | | Criterion  Value |
| --- | --- | --- | --- | --- | --- |
| Criterion=YES (Y) IF: | Criterion=NO (N) IF: | Criterion=UNKNOWN (U) IF: | |
| A-1: Confirmed by pathology | __A-1 = 1 | __ A-1 = 2 | __ A-1 = 3 | A-1 = Y N U | |
| A-2: Confirmed by surgery | __A-2 = 1 or 2 | __ A-2 = 3 | | A-2 = Y N/U | |
| A-3: Confirmed by imaging. | __A-3.1 = 1 | __A3.1 = 2 | __ A-3.1 = 3 | A-3 = Y N U | |
| B-1: DVT syndrome reported | __B-1.1 = 1 AND B-1.2 = ≥1 of (1-2) | __B-1.1 = 2 | __ B-1.1 = 3 | B-1 = Y N U | |
| B-2: ≥1 clinical symptom or sign | __B-2 = ≥1 of (1-4) | __ B-2 = 5 | | B-2 = Y N/U | |
| C. D-Dimer >test lab’s upper normal limit | __C = 1 | __C = 2 | __C = 3 | C = Y N U | |
| X. Alternative diagnosis | __X = 1 | __X = 2 | Not applicable | X = Y N | |

| Level of Certainty |  |
| --- | --- |
| Level 1 | (A-1 OR A-2 OR A-3 = YES) and X = NO or X = Not applicable |
| Level 2 | [B-1 or B-2 = YES ] AND [ C = YES ] AND X = NO |
| Level 3 | [B-1 or B-2 = YES ] AND X = NO |
| Level4-A | If there is insufficient information to determine the conditions needed to a level of certainty of 1, 2 or 3 and F = Yes then the level of certainty is level 4a and x=No? |
| Level 4-B | If there is insufficient information to determine the conditions needed to a level of certainty of 1, 2 or 3 and F = NO then the level of certainty is level 4a and x=No |
| Level 5 | An alternative diagnosis to account for the clinical illness was found (X = YES) |

# Pulmonary Embolism (PE)

The VAC4EU J&J COVID-19 vaccine study has developed a case definition that support the validation of the events of PE identified in the study.

As of March 2023, there appears to be no standard case definition to study PE following vaccination. The approach proposed to validate this outcome will follow the same approach used for PE as a component of TTS. It will use a 365-day clean look-back period to define “new” diagnoses.

Table 13. PE data abstraction form

| Criterion A Confirmation of PE | A-1 Pathologic findings from biopsy or autopsy | Check the one best answer and provide details as appropriate:   - 1. Biopsy showed presence of PE - 2. Autopsy showed presence of PE: (give date of autopsy and brief description in terms of the pathologic proof of PE) - 3. Biopsy or autopsy done but showed no evidence of PE - 4. No biopsy or autopsy done, unknown if done, or done but results unavailable. |
| --- | --- | --- |
| A-2 Surgical procedure | Check the one best answer and provide added details as appropriate:   - 1. Thrombectomy performed* - 2. Other procedure done that confirmed presence of PE* - 3. No surgical procedure done; or, done but either did not confirm presence of PE or findings unknown; or unknown if done   * If 1 or 2 checked describe procedure, location and finding: |
| A-3 Imaging studies confirmed the presence of PE | A-3.1 Choose the one best answer   - 1. ≥1 imaging study was done and confirmed PE (if yes answer A-3.2 below) - 2. ≥1 Imaging study was done but didn’t confirm PE - 3. No imaging studies done, unknown if done, or done but results unknown |
| A-3.2 If option 1 chosen for A-3.1, which studies confirmed PE? Check all that apply   - 1. Echocardiogram - 2. CT pulmonary angiography - 3. Ventilation-Perfusion (V/Q) scan (Ventilation-Perfusion scintigraphy) - 4. Pulmonary angiography - 5. Other – Describe: |
| A-3.3 Describe location(s) of thrombosis/thromboembolism based on imaging study: |
| Criterion B: Clinical evidence for presence of PE | B-1 Signs and symptoms of PE reported | Choose the one best answer:   - 1. ≥1 sign or symptom of PE was reported (if yes, answer B-2 below) - 2. There was no report of recognized PE signs or symptoms - 3. It is unknown if there was a report of PE signs or symptoms |
| B-2 New onset clinical symptoms or signs that could suggest PE | Check all that apply:   - 1 Sudden shortness of breath - 2.Chest pain - 3. Tachypnea(1) - 4. Tachycardia (2) - 5. Cyanosis - 6. Hypotension - 7. Sudden unexpected death - 8. None of the above were present or it is unknown if any of 1-8 were present. |
| Criterion C  D-Dimer | Choose the one best answer:   - 1. D-dimer exceeded test lab’s upper limit of normal.   What was the highest measured value within 2 weeks before and 2 weeks after the date of the event under validation:  If known, please indicate the test lab’s upper limit of normal:   - 2. D-dimer tested and was within test lab’s range of normal - 3. D-dimer not tested, or tested but results unknown or not available | |
| Criterion D: Imaging studies that supported but did not confirm the presence of PE | D-1 Chest radiograph (CXR) | Choose the one best answer:   - 1. CXR done and showed ≥1 of the following: wedge shaped opacity; pleural effusion; prominent proximal pulmonary artery with reduction in peripheral vessel markings - 2. CXR done and was normal or had none of the findings listed in choice 1 above - 3. CXR was not done or CXR done but results unknown |
| D-2 Transthoracic Echocardiogram (T-Echo) | Choose the one best answer   - 1. T-Echo was done and showed ≥1 of the following: right heart dilation; tricuspid regurgitation; interventricular septal compression; or right ventricular hypokinesia. - 2. T-echo was done and was normal or had none of the findings listed in choice 1 above - 3. T-echo was not done, or T-echo done but results unknown. |
| D-3 non-contrast computed tomography (CT) | Choose the one best answer:   - 1. Non-contrast chest CT was done and showed ≥1 of the following: wedge shaped opacity; pleural effusion; prominent proximal pulmonary artery with reduction in peripheral vessel markings - 2. Non-contrast CT was done and was normal or had none of the findings listed in choice 1. - 3. Non-contrast CT not done or done but results unknown. |
| D-4 Evidence of limb DVT | - 1. Imaging test confirmed presence of DVT - 2. Imaging tests to diagnose DVT conducted but did not confirm presence of DVT - 3. Imaging tests to diagnose DVT were not conducted or results are unknown |
| Condition F: | Reported as a case of TTS by specialist, without details   - Yes - No | |
| Criterion X:  Alternative diagnosis | Choose the one best answer   - 1. An alternative diagnosis was found that explained the acute illness, describe:___________________________________________________________________   2. No alternative diagnosis was found to explain the acute illness | |

| CRITERIA | CRITERION OPTIONS | | | | Criterion  Value |
| --- | --- | --- | --- | --- | --- |
| Criterion=YES (Y) IF: | Criterion=NO (N) IF: | Criterion=UNKNOWN (U) IF: | |
| Pulmonary Embolism:  A-1: Confirmed by pathology | __A-1 = 1 or 2 | __ A-1 = 3 | __ A-1 = 4 | A-1 = Y N U | |
| A-2: Confirmed by surgery | __A-2 = 1 or 2 | __ A-2 = 3 | | A-2 = Y N/U | |
| A-3: Confirmed by imaging | __A-3.1 = 1 AND A-3.2≥1 of (1-5) | __A3.1 = 2 | __ A-3.1 = 3 | A-3 = Y N U | |
| B-1: PE signs and symptoms reported | __B-1.1 = 1 | __B-1.1 = 2 | __ B-1.1 = 3 | B-1 = Y N U | |
| B-2: ≥1 non-specific clinical symptom or sign | __B-2 = ≥1 of (1-8) | __ B-2 = 9 | | B-2 = Y N/U | |
| C. D-Dimer >test lab’s upper normal limit | __C = 1 | __C = 2 | __C = 3 | C = Y N U | |
| D. Imaging studies supported but couldn’t confirm PE | __(D-1 = 1) or (D-2 = 1) or (D-3 = 1) or (D-4= 1) | __(D-1 = 2 or 3) and (D-2 = 2 or 3) and (D-3 = 2 or 3) and (D-4= 2 or 3) | | D = Y N/U | |
| X. Alternative diagnosis | __X = 1 | __X = 2 | Not applicable | X = Y N | |

| Level of Certainty |  |
| --- | --- |
| Level 1 | A-1 OR A-2 OR A-3 = YES |
| Level 2 | [B-1 or B-2 = YES] AND [ C AND D = YES ] AND X = NO |
| Level 3 | [B-1 or B-2 = YES] AND X = NO |
| Level 4-A | If there is insufficient information to determine the conditions needed to a level of certainty of 1, 2 or 3 and E = Yes then the level of certainty and X=NO is level 4-A |
| Level 4-B | If there is insufficient information to determine the conditions needed to a level of certainty of 1, 2 or 3 and E = NO then the level of certainty and X=NO is **Level 4-B** |
| Level 5 | An alternative diagnosis to account for the clinical illness was found (X = YES) |

# Hemorrhagic Stroke (acute intracerebral hemorrhage)

The VAC4EU J&J COVID-19 vaccine study has developed a case definition that support the validation of the events of hemorrhagic stroke identified in the study.

As of March 2023, there appears to be no standard case definition to study hemorrhagic stroke following vaccination. The approach proposed to validate this outcome will use a 365-day clean look-back period to define “new” diagnoses.

 Table 14. Hemorrhagic stroke data abstraction form

| Confirmation of hemorrhagic stroke | A-1 Pathologic findings from autopsy | Check the one best answer and provide details as appropriate:   - 1. Autopsy showed presence of hemorrhagic stroke: (give date of autopsy and brief description in terms of the pathologic proof of acute intracerebral hemorrhage if present) - 2. Autopsy done but did not show evidence of hemorrhagic stroke - 3. No autopsy done, unknown if done, or done but results unavailable. |
| --- | --- | --- |
| A-2 Surgical procedure | Check the one best answer and provide added details as appropriate:   - 1. External ventricular drain - 2. Surgical hematoma evacuation - 3. Decompressive craniotomy with or without hematoma evacuation - 4.Minimally invasive surgery - 5.Surgical procedure unspecified but confirms hemorrhagic stroke - 6.No surgical procedure done; or, done but either did not confirm presence of acute intracerebral hemorrhage or findings unknown; or unknown if done |
| A-3 Imaging studies confirmed the presence of hemorrhagic stroke | A-3.1 Choose the one best answer   - 1. ≥1 imaging study was done and confirmed a hemorrhagic stroke (if yes answer A-3.2 below) - 2. ≥1 Imaging study was done but didn’t confirm hemorrhagic stroke - 3. No imaging studies done, unknown if done, or done but results unknown |
| A-3.2 If option 1 chosen for A-3.1, which studies confirmed a hemorrhagic stroke? Check all that apply   - 1. Non-contrast computerized tomography (CT) - 2. MRI - 3. CT or MRI angiography - 4. Other – Describe: |
| A-3.3 Describe location(s) of the hemorrhagic stroke based on imaging study recorded in A-3.2: |
| Criterion B:  Clinical evidence for presence of a hemorrhagic stroke | B-1 Reported hemorrhagic stroke  syndrome | Choose the one best answer:   - 1.A hemorrhagic stroke was reported. (If yes, answer B-2 below)   2. There was no report of a recognized hemorrhagic stroke |
| B-2 New onset clinical symptoms or signs that could suggest a hemorrhagic stroke | Check all that apply:   - 1. Sudden headache - 2. Loss of, or change in, level of consciousness - 3. Seizure(s) - 4. Focal neurologic abnormalities (e.g., facial paralysis, difficulty with speech, ataxic gait, hemiparesis, abnormal eye movements, blurred vision or seeing double) - 5. Mention of elevated blood pressure 48h before and after the date of the event (provide value of highest systolic and diastolic blood pressure, if available: ________ mmHg / ________ mmHg   6. None of the above were present or it is unknown if any of 1-5 were present |

| Criterion X:  Alternative diagnosis | Choose the best answer   - 1. An alternative diagnosis was found that explained the acute illness, describe:   _________________________________________________________________________   - 2. No alternative diagnosis was found to explain the acute illness |
| --- | --- |

| CRITERIA | CRITERION OPTIONS | | | Criterion  Value |
| --- | --- | --- | --- | --- |
| Criterion=YES (Y) IF: | Criterion=NO (N) IF: | Criterion=UNKNOWN (U) IF: |
| Ischemic stroke:  A-1: Confirmed by pathology | __A-1 = 1 | __A-1 = 2 | __A-1 = 3 | A-1 = Y    N     U |
| A-2: Confirmed by surgery | __A-2 = 1 - 5 | __A-2 = 6 | | A-2 = Y     N/U |
| A-3: Confirmed by imaging. | __A-3.1 = 1 and A-3.2 = ≥1 of (1-4) | __A3.1 = 2 | __A-3.1 = 3 | A-3 = Y    N    U |
| B-1:  hemorrhagic stroke reported | __B-1 = 1 | __B-1 = 2 | | B-1 = Y    N     U |
| B-2: ≥1 clinical symptom or sign | __B-2  ≥1 of (1-5) | __ B-2 = 6 | | B-2 = Y      N/U |
| X. Alternative diagnosis | __X = 1 | __X = 2 | Not applicable | X = Y       N |

| Level of Certainty |  |
| --- | --- |
| Level 1 | A-1 OR A-2 OR A-3 = YES |
| Level 2 | [B-1 AND B-2= YES] AND X = NO |
| Level 3 | [B-1 = YES] AND X = NO |
| Level 4a | Not applicable |
| Level 4b | Reported as a case of hemorrhagic stroke but fails to meet any level of certainty |
| Level 5 | An alternative diagnosis to account for the clinical illness was found (X = YES) |

# Ischemic stroke

The VAC4EU J&J COVID-19 vaccine study has developed a case definition that support the validation of the events of ischemic stroke identified in the study.

As of March 2023, there appears to be no standard case definition to study ischemic stroke following vaccination. The approach proposed to validate this outcome will use a 365-day clean look-back period to define “new” diagnoses.

 Table 15. stroke data abstraction form

| Confirmation of ischemic stroke | A-1 Pathologic findings from autopsy or biopsy | Check the one best answer and provide details as appropriate:   - 1. Autopsy showed presence of ischemic stroke: (give date of autopsy and brief description in terms of the pathologic proof of thrombosis or thromboembolism or both if present) - 2. Autopsy done but did not show ischemic stroke - 3. No autopsy done, unknown if done, or done but results unavailable. |
| --- | --- | --- |
| A-2 Surgical procedure | Check the one best answer and provide added details as appropriate:   - 1. Thrombectomy performed* - 2. Other or unspecified procedure done that confirmed the presence of cerebral artery thrombosis or thromboembolism* - 3. No surgical procedure done; or, done but either did not confirm presence of cerebral artery thrombosis or thromboembolism or findings unknown; or unknown if done   * If 1 or 2 checked describe procedure, location and finding: _____________________________  ______________________________________________________________________ |
| A-3 Imaging studies confirmed the presence of ischemic stroke | A-3.1 Choose the one best answer   - 1. ≥1 imaging study was done and confirmed an ischemic stroke (if yes answer A-3.2 below) - 2. ≥1 Imaging study was done but didn’t confirm ischemic stroke - 3. No imaging studies done, unknown if done, or done but results unknown |
| A-3.2 If option 1 chosen for A-3.1, which studies confirmed an ischemic stroke? Check all that apply   - 1. Diffusion weighted MRI - 2. CT or MRI angiography - 3. Ultrasound (carotid of transcranial Doppler) - 4. Perfusion CT or MRI - 5. Positron emission tomography (PET)) - 6. Other – Describe: |
| A-3.3 Describe location(s) of the ischemic stroke based on imaging study: |
| Criterion B: Clinical evidence for presence of an ischemic stroke | New onset clinical symptoms or signs that could suggest an ischemic stroke | Check all that apply:  1. Sudden painless loss of vision  2. Loss of, or change in, level of consciousness  3. Seizure(s)  4. Focal neurologic abnormalities (e.g., facial paralysis, difficulty with speech, ataxic gait, hemiparesis, abnormal eye movements, blurred vision or seeing double)  5. None of the above were present or it is unknown if any of 1-5 were present |
| Criterion C: Imaging studies to rule out hemorrhagic stroke | Choose the one best answer:  1. Imaging study done and showed evidence of an ischemic stroke with absence of intracranial bleeding  2. Imaging study done and showed evidence of intracranial bleeding, or no imaging study done | |
| Criterion D: Reported ischemic stroke | Reported as a case of ischemic stroke by specialist, without details   - Yes - No | |
| Criterion X:  Alternative diagnosis | Choose the one best answer  1. An alternative diagnosis was found that explained the acute illness, describe:___________________________________________________________________  2. No alternative diagnosis was found to explain the acute illness | |

| Level of Certainty |  |
| --- | --- |
| Level 1 | A-1 OR A-2 OR A-3 = YES |
| Level 2 | [B = YES] AND [C = YES] AND X = NO |
| Level 3 | [B= YES] AND X = NO |
| Level 4 a | [D= YES] AND X = NO |
| Level 4 b | Reported as a case of ischemic stroke but fails to meet any level of certainty |
| Level 5 | An alternative diagnosis to account for the clinical illness was found (X = YES) |

| CRITERIA | CRITERION OPTIONS | | | Criterion  Value |
| --- | --- | --- | --- | --- |
| Criterion=YES (Y) IF: | Criterion=NO (N) IF: | Criterion=UNKNOWN (U) IF: |
| Ischemic stroke:  A-1: Confirmed by pathology | __A-1 = 1 | __A-1 = 2 | __A-1 = 3 | A-1 = Y    N     U |
| A-2: Confirmed by surgery | __A-2 = 1 or 2 | __A-2 = 3 | | A-2 = Y     N/U |
| A-3: Confirmed by imaging | __A-3.1 = 1 and A-3.2 ≥1 of (1-6) | __A3.1 = 2 | __A-3.1 = 3 | A-3 = Y    N    U |
| B: ≥1 clinical symptom or sign | __B = ≥1 of (1-4) | __ B = 5 | | B-2 = Y      N/U |
| D:Reported ischemic stroke | __D = 1 | __D = 2 | | D = Y      N/U |
| C: Imaging studies supported but couldn’t confirm an ischemic stroke | __C = 1 | __C = 2 | | D = Y        N/U |
| X: Alternative diagnosis | __X = 1 | __X = 2 | Not applicable | X = Y       N |

# Meningoencephalitis including ADEM

The VAC4EU J&J COVID-19 vaccine study has developed a case definition that support the validation of the events of meningoencephalitis including ADEM identified in the study.

The BC case definition for meningoencephalitis including ADEM used was

Law B. AESI Case Definition Companion Guide: Acute Disseminated Encephalomyelitis. Zenodo; 2021 Feb https://doi.org/10.5281/zenodo.6668857

The questionnaires for validation of this AESI are split for infectious meningoencephalitis and ADEM, because of their different pathophysiologic nature. The event will be considered to have reached the highest level of certainty achieved for the 2 components of the AESI.

Table 16. Meningoencephalitis including ADEM data abstraction form

| Criterion AA Confirmation of infectious meningoencephalitis  AA-1 Pathologic findings from autopsy/Biopsy  AA-1.1 Check the one best answer and provide details as appropriate:   - 1. Autopsy / biopsy showed presence of infectious meningoencephalitis: (give date of autopsy and brief description in terms of the pathologic proof of infectious meningoencephalitis if present) - 2. Autopsy / biopsy done but showed no evidence of infectious meningoencephalitis - 3. Autopsy / biopsy not done, unknown if done, or done but results unavailable.   AA-2 Cerebrospinal fluid investigation confirmed the presence of infectious meningoencephalitis  AA-2.1 Choose the one best answer   - 1. Cerebrospinal fluid investigation study was done and confirmed infectious meningoencephalitis (if yes answer AA-2.2 below) - 2. Cerebrospinal fluid investigation study was done but didn’t confirm infectious meningoencephalitis - 3. No cerebrospinal fluid investigation done, unknown if done, or done but results unknow   AA-2.2 If option 1 chosen for AA-2.1, which was the causal agent identified for infectious meningoencephalitis?  ______________________________________________________________________  ______________________________________________________________________  AA-3 Blood testing supporting the diagnosis of infectious meningoencephalitis  AA-3.1 Choose the one best answer   - 1. Blood culture, PCR, or immunochromatographic antigen testing were done and supported the diagnosis of infectious meningoencephalitis (if yes answer AA-3.2 below) - 2. Blood culture, PCR, or immunochromatographic antigen testing were done but didn’t support the diagnosis of infectious meningoencephalitis - 3. No blood culture, PCR, or immunochromatographic antigen testing were done unknown if done, or done but results unknow   AA-3.2 If option 1 chosen for AA-3.1, which was the causal agent identified for infectious meningoencephalitis? ___ | | |
| --- | --- | --- |
| Criterion BA: Imaging studies support the diagnosis of infectious meningoencephalitis | BA-1 Imaging studies conducted that support the diagnosis of infectious meningoencephalitis | BA-1.1 Check all that apply:   - 1. Brain MRI (such as T2 hyperintensity, Diffuse cerebral atrophy) - 2. Cranial CT scan - 3. Electroencephalogram - 4. Other imaging tests. Specify which: ____ - 5. Imaging studies conducted and did not suggest diagnosis of infectious meningoencephalitis - 6. No imaging studies conducted or conducted but results unknown |
| Criterion CA: Clinical evidence for presence of infectious meningoencephalitis | CA-1 Signs and symptoms of infectious meningoencephalitis reported | CA-1.1 Choose the one best answer:   - 1. ≥1 symptom or sign of infectious meningoencephalitis was reported. (If yes, answer CA-2.2 below) - 2. There was no report of a recognized an infectious meningoencephalitis syndrome - 3. It is unknown if there was a report of an infectious meningoencephalitis syndrome |
| CA-2 New onset clinical symptoms or signs that could suggest an infectious meningoencephalitis | CA-2.2 Check all that apply:   - 1. Fever - 2. Irritability - 3. Behavioural changes - 4. Meningism - 5. Focal neurological signs - 6. Seizures - 7. Headache - 8. Nausea/Vomiting - 9. Altered level of consciousness - 10. Petechial rash/purpura - 11. None of the above were present or it is unknown if any of 1-10 were present |
| Criterion XA: Alternative diagnosis | Choose the one best answer   - 1. An alternative diagnosis was found that explained the acute illness: describe-   _________________________________________________________________   - 2. No alternative diagnosis was found to explain the acute illness | |

| Criterion AB Confirmation of ADEM | AB-1 Pathologic findings from autopsy/biopsy | AB-1.1 Check the one best answer and provide details as appropriate:   - 1. Autopsy/biopsy showed presence of ADEM: (give date of autopsy and brief description in terms of the pathologic proof of ADEM if present) - 2. Autopsy/biopsy done but showed no evidence of ADEM - 3. Autopsy/biopsy not done, unknown if done, or done but results unavailable. | |
| --- | --- | --- | --- |
| BB-1 Imaging studies conducted that support the diagnosis of ADEM | BB-1.1 Check all that apply:   - 1. Brain MRI (such as multiple lesions in the deep, subcortical and periventricular white matter, characteristic of demyelination) - 2. Other imaging tests. Specify which: ____________________________________________________________________________ - 3. Imaging studies conducted and did not suggest diagnosis of ADEM - 4. No imaging studies conducted or conducted but results unknown | | |
| Criterion CB: Clinical evidence for presence of ADEM | CB-1 Signs and symptoms of ADEM reported | | CB-1.1 Choose the one best answer:   - 1. ≥1 symptom or sign of ADEM was reported. (If yes, answer CB-2.2 below) - 2. There was no report of a recognized ADEM syndrome - 3. It is unknown if there was a report of a ADEM syndrome |
| CB-2 New onset clinical symptoms or signs that could suggest an ADEM | | CB-2.2 Check all that apply:   - 1. Ataxia - 2. Altered level of consciousness - 3. Brainstem symptoms (such as Balance problems or dizziness.   Inability to gag or cough, Insomnia, Nausea or vomiting, Stroke symptoms.  Sudden difficulty swallowing, drinking or eating.   - 4. Optic neuritis - 5. Transverse myelitis - 6. Seizures - 7. Headache - 8. Meningism - 9. Fever - 10. None of the above were present or it is unknown if any of 1-9 were present |
| Criterion XB: Alternative diagnosis | Choose the one best answer   - 1. An alternative diagnosis was found that explained the acute illness: describe-   _________________________________________________________________   - 2. No alternative diagnosis was found to explain the acute illness | | |

| CRITERIA | CRITERION OPTIONS | | | | Criterion  Value | |
| --- | --- | --- | --- | --- | --- | --- |
| Criterion=YES (Y) IF: | Criterion=NO (N) IF: | Criterion=UNKNOWN (U) IF: | |
| Meningoencephalitis including ADEM diagnosis:  A-1: Confirmed by pathology | AA-1.1 = 1 OR AB-1.1 = 1 | AA-1.1 = 2 AND AB-1.1 = 2 | AA-1.1 = 3 AND AB-1.1 = 3 | A-1 = Y N U | |
| A-2: Confirmed by cerebrospinal fluid investigation | AA-2.1 = 1 | AA-2.1 = 2 or 3 | | A-2 = Y N/U | |
| A3: Supported by blood testing | AA-3.1 = 1 | AA-3.1 = 2 or 3 | | A-3= Y N/U | |
| B-1: Imaging studies supporting meningoencephalitis including ADEM syndrome reported | BA-1.1 ≥1 of (1-4) OR BB-1.1 ≥1 of (1-2) | BA-1.1 = 5 AND BB-1.1 = 3 | BA-1.1 = 6 AND BB-1.1 = 4 | B-1 = Y N U | |
| C-1. Clinical evidence for presence of meningoencephalitis including ADEM | CA-1.1 = 1 OR CB-1.1 = 1 | CA-1.1 = 2 AND CB-1.1 = 2 | CA-1.1 = 3 AND CB-1.1 = 3 | C-1 = Y N U | |
| C-2 New onset clinical symptoms or signs that could suggest a meningoencephalitis including ADEM | CA-2.2 = 1 to 10 OR CB-2.2 = 1 to 9 | CA-2.2 =11 AND CB-2.2 =10 | | C-2= Y N/U | |
| X. Alternative diagnosis | XA = 1 OR XB = 1 | XA = 2 AND XB = 2 | Not applicable | X = Y N | |

| Level of Certainty |  |
| --- | --- |
| Level 1 | A-1 OR A-2 = YES |
| Level 2 | [A-3= YES OR B-1 = YES] AND [ C-1 OR C-2 = YES ] AND X = NO |
| Level 3 | [ A-3= YES OR B-1 = YES ] AND [C-1 AND C-2 = NO/U] AND X = NO |
| Level 4 | Reported as a case of meningoencephalitis including ADEM but fails to meet any level of certainty AND X = NO |
| Level 5 | An alternative diagnosis to account for the clinical illness was found (X = YES) |

# Bleeding with Thrombocytopenia (BT)

The VAC4EU members that are part of the research team participating in the AstraZeneca COVID19 PASS aim to develop a case definition that supports the validation of the events of bleeding with thrombocytopenia identified in the study.

As of April 2023, there appears to be no standard case definition to study thrombocytopenia with bleeding following vaccination. The approach proposed to identify this outcome in automated data will follow the same approach used for TTS, using bleeding instead of thrombosis to anchor the search. It will use a 365-days clean look-back period to define “new” diagnoses. Briefly, the working case definition for thrombocytopenia with bleeding for this study requires 2 components:

• A new qualifying bleeding event (defined below) AND

• A new diagnosis of thrombocytopenia (or laboratory evidence of the same, where available) that is made from 10 days before and up to 10 days after that event

Bleeding events will include new diagnoses of clinically significant bleeds in the central nervous system, respiratory tract, gastrointestinal tract, or genitourinary tract, where “clinically significant” means requiring hospitalisation or emergency department care.

The goal of this document is to develop an electronic case report form (eCRF) to facilitate the extraction of the data from the participating databanks and determine the level of certainty of each case. The Case Definition (CD) Level of Certainty (LOC) is determined based on a series of clinical conditions defined below.

| 1. Date of event onset |  |
| --- | --- |
| 2.Date of Thrombocytopenia |  |
| 3. Hospital admission? (no/yes, date_) |  |
| 4. Admitting diagnosis: |  |
| 5. Discharge diagnosis: |  |

**Condition A1: ☐ Patient required hospitalisation or emergency department visit**

**Condition A2:** **☐ Platelet count <150 X 10˄9/L of new onset with no known recent exposure to heparin (within the last 30 days)**

**Condition B1: ☐ Presence of bleeding confirmed by ≥ 1 of the following** (Check all that apply below)

☐ **Imaging Study**

☐ Endoscopy

☐ Colonoscopy

☐ Ultrasound – Doppler

☐ CT scan – contrast/ angiography/ CR Urogram/ MR Urogram

☐ Multidetector CT (MDCT)

☐ Magnetic resonance venography or arteriography

☐ Magnetic resonance

☐ Perfusion V/Q scan

☐ Conventional angiography / digital subtraction angiography

☐ Bronchoscopy

☐ Cystography

☐ No imaging studies done, unknown if done, or done but results unknown

☐ **Surgical procedure** - that confirmed presence of a bleeding or repair of bleeding (e.g. drainage of subarachnoid hemorrhage)

Please describe: _______

☐ **Pathologic examination** – including biopsy or autopsy

Please describe: _______

☐**Visual evidence of bleeding**

☐Gastrointestinal bleeding

☐ Hematemesis

☐ Melena

☐ Other, please describe: _______________

☐ Genitourinary bleeding

☐ Hematuria

☐ Other, please describe: ____________

☐Respiratory tract bleeding

☐ Epistaxis

☐ Hemorrhage from respiratory passage/hemoptisis

☐Cough with hemorrhage

☐ Other, please describe:

**Condition C: ☐ Clinical presentation suggests one of the specific clinical syndromes below?** (Check the most appropriate) NOTE: the italicized signs/symptoms in brackets after each are suggestive of the syndrome but not an exhaustive list; if any of them is present you can check the item. Diagnosis of the syndrome by a clinical specialist is also acceptable

☐ Central nervous system bleeding

- *Headache*
- *Vomiting*
- *Paralysis*
- *Numbness*
- *Dysarthria*
- *Altered mental status*
- *Neck pain or nuchal rigidity*
- *loss of balance*
- *Blurred vision*
- *Seizure*
- *Motor dysfunction*
- *Other, please describe: __________*
- *Diagnosis by specialist without details*

☐ Gastrointestinal bleeding

- - Non-visual evidence of bleeding, please describe: ___________
  - *Diagnosis by specialist without details*

☐ Genitourinary bleeding

- Non-visual evidence of bleeding, please describe: ___________
- *Diagnosis by specialist without details*

☐ Respiratory tract bleeding

- *Pulmonary hemorrhage,*
- *Shortness of breath,*
- *Dyspnea*,
- Non-visual evidence of bleeding, please describe:___________
- *Diagnosis by specialist without details*

**Condition D: ☐ One or more of these imaging or lab findings supportive of the diagnosis of bleeding?** (Check all that apply)

☐ Stool test

☐ Chest radiograph (CXR)

☐ Ultrasound scans

☐ Computed tomography without contrast

☐ Hemoglobin decreased below lower limit of normal,value____

**Condition E :** R**eported as a case of Thrombocytopenia with bleeding by specialist, without details**

- Yes
- No

**Condition X: ☐ An alternative diagnosis was found that explains the acute illness** (Should not include causes or risk factors for bleeding such as hemophilia, vit k deficiency, cancer, etc…)

Describe: _____________

**☐ No alternative diagnosis was found that explains the acute illness**

**BT Case Definition Level of Certainty Determination**

- If yes to (A1, and A2, and B1) : then is **Level 1**
- If no to (B1) _and_ [If yes to (A1 and A2) AND yes to (C and D) AND no to (X)] then is **Level 2**
- If no to (B1) _and_ [If yes to (A1 and A2) AND yes to (C) AND no to (D, and X)] then is **Level 3**
- If there is insufficient information to determine the conditions needed to a level of certainty of 1, 2 or 3 and E = Yes then the level of certainty is level 4a
- If there is insufficient information to determine the conditions needed to a level of certainty of 1, 2 or 3 and E = NO then the level of certainty is **Level 4-B**
- If there is sufficient information to determine the conditions A, B, C, D, and X but the aggregate of the conditions do not meet the LOC 1, 2, or 3 and/or X=YES then the LOC is **Level 5;** Not a Case of hospitalisation or emergency department visit due to thrombocytopenia with bleeding

1. Lee Y, McKechnie T, Doumouras AG, Handler C, Eskicioglu C, Gmora S, Anvari M, Hong D. Diagnostic Value of C-Reactive Protein Levels in Postoperative Infectious Complications After Bariatric Surgery: a Systematic Review and Meta-Analysis. Obes Surg. 2019 Jul;29(7):2022-2029. [[PubMed](https://pubmed.ncbi.nlm.nih.gov/30895509)]

   Johns I, Moschonas KE, Medina J, Ossei-Gerning N, Kassianos G, Halcox JP. Risk classification in primary prevention of CVD according to QRISK2 and JBS3 'heart age', and prevalence of elevated high-sensitivity C reactive protein in the UK cohort of the EURIKA study. Open Heart. 2018;5(2):e000849. [[PMC free article](https://www.ncbi.nlm.nih.gov/pmc/articles/PMC6269641/)] [[PubMed](https://pubmed.ncbi.nlm.nih.gov/30564373)] [↑](#footnote-ref-1)
2. https://labpedia.net/cardiac-marker-part-2-ck-mb-cardiac-enzyme/#:~:text=CK%2DMB%20significance%3A,onset%20of%20acute%20myocardial%20infarction. [↑](#footnote-ref-2)
3. Hasbun R. Cerebrospinal fluid in central nervous system infections. In: Infections of the central nervous system, 4th edition, Scheld WM, Whitley RJ, Marra CM (Eds), Lippincott Williams, 2014. p.4. [↑](#footnote-ref-3)
